# Supplementary material for: Reduction of CO2 captured in basic solutions with biomass as reducing agent and metallic catalysts
Source: Royal Society of Chemistry journal article supplement (doi:10.1039/d4su00440j), 2024-11-21

SUPPLEMENTARY INFORMATION

# Reduction of CO<sub>2</sub> captured in basic solutions with biomass as reducing agent and metallic catalysts

Maira I. Chinchilla<sup>a,b</sup>, Ángel Martín<sup>a,b</sup>, J. McGregor<sup>c</sup>, Fidel A. Mato<sup>a,b</sup>, María D.

Bermejo<sup>\*a,b</sup>

|                                                                      |    |
|----------------------------------------------------------------------|----|
| 1. FORMIC ACID .....                                                 | 2  |
| 1.1 Formic acid yields for different catalysts and biomass.....      | 2  |
| 1.2 Variation of formic acid yields with amount of biomass.....      | 3  |
| 1.3 Variation of formic acid yields with temperature .....           | 3  |
| 2. ACETIC ACID .....                                                 | 4  |
| 2.1 Acetic acid yields for different catalysts and biomass type..... | 4  |
| 2.2 Variation of acetic acid yields with amount of biomass.....      | 5  |
| 2.3 Variation of acetic acid yields with temperature .....           | 6  |
| 3. LACTIC ACID.....                                                  | 7  |
| 3.1 Lactic acid for different catalysts and biomass.....             | 7  |
| 3.2 Variation of lactic acid yields with amount of biomass.....      | 8  |
| 3.3 Variation of lactic acid yields with temperature .....           | 8  |
| 4. NMR DIAGRAMS.....                                                 | 10 |
| 1 <sup>st</sup> EXPERIMENTS AT 300°C.....                            | 10 |
| 2 <sup>nd</sup> EXPERIMENTS AT 300°C .....                           | 16 |
| 1 <sup>st</sup> EXPERIMENTS AT 200°C .....                           | 23 |
| 2 <sup>nd</sup> EXPERIMENTS AT 200°C .....                           | 33 |

## 1. FORMIC ACID

### 1.1 Formic acid yields for different catalysts and biomass

**Conditions:** 0.5 M Sodium bicarbonate, 0.1 g biomass, 300 °C, 4.5 ml of liquid solution, 0.1 g of respective catalyst

#### First set of experiments

| Catalyst    | Sugar beet | Pine needles | Vermi-compost | Sugarcane bagasse | Cellulose | Cork | Softwood |
|-------------|------------|--------------|---------------|-------------------|-----------|------|----------|
| No catalyst | 7%         | 6%           | 2%            | 0%                | 11%       | 5%   | 0%       |
| C powder    | 1%         | 5%           | 2%            | 3%                | 11%       | 5%   | 6%       |
| Pd/C 5%     | 9%         | 6%           | 2%            | 9%                | 17%       | 4%   | 9%       |
| Ru/C 5%     | 7%         | 6%           | 3%            | 4%                | 3%        | 4%   | 4%       |
| C granular  | 1%         | 6%           | 2%            | 8%                | 11%       | 5%   | 6%       |
| Pd/C 10%    | 8%         | 6%           | 2%            | 6%                | 15%       | 7%   | 10%      |

#### Second set of experiments

| Catalyst    | Sugar beet | Pine needles | Vermi-compost | Sugarcane bagasse | Cellulose | Cork | Softwood |
|-------------|------------|--------------|---------------|-------------------|-----------|------|----------|
| No catalyst | 8%         | 6%           | 2%            | 7%                | 10%       | 5%   | 8%       |
| C powder    | 3%         | 5%           | 2%            | 5%                | 9%        | 5%   | 6%       |
| Pd/C 5%     | 8%         | 9%           | 1%            | 9%                | 18%       | 6%   | 13%      |
| Ru/C 5%     | 5%         | 6%           | 3%            | 5%                | 3%        | 5%   | 4%       |
| C granular  | 7%         | 5%           | 3%            | 7%                | 10%       | 5%   | 4%       |
| Pd/C 10%    | 8%         | 7%           | 2%            | 13%               | 17%       | 2%   | 10%      |

#### Average yields of formic acid

| Catalyst    |                    | Sugar beet | Pine needles | Vermi-compost | Sugarcane bagasse | Cellulose | Cork | Softwood |
|-------------|--------------------|------------|--------------|---------------|-------------------|-----------|------|----------|
| No catalyst | Average            | 8%         | 6%           | 2%            | 3%                | 10%       | 5%   | 4%       |
|             | Standard deviation | 1%         | 0%           | 0%            | 5%                | 1%        | 0%   | 2%       |
| C powder    | Average            | 2%         | 5%           | 2%            | 4%                | 10%       | 5%   | 6%       |
|             | Standard deviation | 1%         | 0%           | 0%            | 1%                | 1%        | 0%   | 0%       |
| Pd/C 5%     | Average            | 9%         | 7%           | 2%            | 9%                | 18%       | 5%   | 11%      |
|             | Standard deviation | 1%         | 2%           | 0%            | 0%                | 1%        | 2%   | 3%       |
| Ru/C 5%     | Average            | 6%         | 6%           | 3%            | 5%                | 3%        | 4%   | 4%       |
|             | Standard deviation | 1%         | 0%           | 0%            | 0%                | 0%        | 0%   | 0%       |
| C granular  | Average            | 4%         | 6%           | 2%            | 7%                | 11%       | 5%   | 5%       |
|             | Standard deviation | 4%         | 0%           | 0%            | 1%                | 1%        | 0%   | 1%       |
| Pd/C 10%    | Average            | 8%         | 6%           | 2%            | 9%                | 16%       | 5%   | 10%      |
|             | Standard deviation | 0%         | 0%           | 0%            | 5%                | 1%        | 3%   | 0%       |

## 1.2 Variation of formic acid yields with amount of biomass

Conditions: 0.5 M Sodium bicarbonate, 0.1 g Pd/C 5%, 300 °C, 4.5 ml of liquid solution

### 0.025 g

| Repetition         | Sugar beet | Pine needles | Vermi-compost | Sugarcane bagasse | Cellulose | Cork | Softwood |
|--------------------|------------|--------------|---------------|-------------------|-----------|------|----------|
| 1                  | 5%         | 3%           | 4%            | 6%                | 7%        | 2%   | 7%       |
| 2                  | 5%         | 5%           | 4%            | 8%                | 7%        | 4%   | 7%       |
| Average            | 5%         | 4%           | 4%            | 7%                | 7%        | 3%   | 7%       |
| Standard deviation | 1%         | 1%           | 0%            | 1%                | 0%        | 1%   | 0%       |

### 0.05 g

| Repetition         | Sugar beet | Pine needles | Vermi-compost | Sugarcane bagasse | Cellulose | Cork | Softwood |
|--------------------|------------|--------------|---------------|-------------------|-----------|------|----------|
| 1                  | 10%        | 6%           | 1%            | 10%               | 13%       | 3%   | 9%       |
| 2                  | 8%         | 6%           | 1%            | 10%               | 13%       | 4%   | 9%       |
| Average            | 9%         | 6%           | 1%            | 10%               | 13%       | 4%   | 9%       |
| Standard deviation | 1%         | 0%           | 0%            | 0%                | 0%        | 1%   | 0%       |

### 0.1 g

| Repetition         | Sugar beet | Pine needles | Vermi-compost | Sugarcane bagasse | Cellulose | Cork | Softwood |
|--------------------|------------|--------------|---------------|-------------------|-----------|------|----------|
| 1                  | 9%         | 6%           | 2%            | 9%                | 17%       | 4%   | 9%       |
| 2                  | 8%         | 9%           | 1%            | 9%                | 18%       | 6%   | 13%      |
| Average            | 9%         | 7%           | 2%            | 9%                | 18%       | 5%   | 11%      |
| Standard deviation | 1%         | 2%           | 0%            | 0%                | 1%        | 2%   | 3%       |

## 1.3 Variation of formic acid yields with temperature

Conditions: 0.5 M Sodium bicarbonate, 0.1 g biomass, 4.5 ml of liquid solution, 0.1 g Pd/C 5%

### 200°C

| Repetition         | Sugar beet | Pine needles | Vermi-compost | Sugarcane bagasse | Cellulose | Cork | Softwood |
|--------------------|------------|--------------|---------------|-------------------|-----------|------|----------|
| 1                  | 2%         | 0.2%         | 1%            | 1%                | 3%        | 0.3% | 1.2%     |
| 2                  | 2%         | 1%           | 0.2%          | 3%                | 3%        | 0.3% | 1%       |
| Average            | 2%         | 0%           | 0%            | 2%                | 3%        | 0%   | 1%       |
| Standard deviation | 0%         | 0%           | 0%            | 2%                | 0%        | 0%   | 0%       |

## 250°C

| Repetition         | Sugar beet | Pine needles | Vermi-compost | Sugarcane bagasse | Cellulose | Cork | Softwood |
|--------------------|------------|--------------|---------------|-------------------|-----------|------|----------|
| 1                  | 7%         | 3%           | 1%            | 8%                | 13%       | 5%   | 8%       |
| 2                  | 6%         | 3%           | 1%            | 6%                | 12%       | 4%   | 5%       |
| 3                  | 5%         | 3%           | 1%            | 6%                | 12%       | 4%   | 10%      |
| Average            | 6%         | 3%           | 1%            | 7%                | 12%       | 5%   | 8%       |
| Standard deviation | 1%         | 0%           | 0%            | 1%                | 0%        | 1%   | 2%       |

## 300°C

| Repetition         | Sugar beet | Pine needles | Vermi-compost | Sugarcane bagasse | Cellulose | Cork | Softwood |
|--------------------|------------|--------------|---------------|-------------------|-----------|------|----------|
| 1                  | 8%         | 9%           | 1%            | 9%                | 18%       | 6%   | 13%      |
| 2                  | 9%         | 6%           | 2%            | 9%                | 17%       | 5%   | 9%       |
| Average            | 9%         | 7%           | 2%            | 9%                | 18%       | 6%   | 11%      |
| Standard deviation | 1%         | 2%           | 0%            | 0%                | 1%        | 1%   | 3%       |

## 2. ACETIC ACID

### 2.1 Acetic acid yields for different catalysts and biomass type

Conditions: 0.5 M Sodium bicarbonate, 0.1 g biomass, 300 °C, 4.5 ml of liquid solution

#### First set of experiments

| Catalyst    | Sugar beet | Pine needles | Vermi-compost | Sugarcane bagasse | Cellulose | Cork | Softwood |
|-------------|------------|--------------|---------------|-------------------|-----------|------|----------|
| No catalyst | 3%         | 2%           | 1%            | 3%                | 2%        | 3%   | 3%       |
| C powder    | 2%         | 4%           | 2%            | 4%                | 2%        | 2%   | 3%       |
| Pd/C 5%     | 6%         | 5%           | 3%            | 7%                | 3%        | 3%   | 2%       |
| Ru/C 5%     | 4%         | 3%           | 2%            | 5%                | 2%        | 2%   | 3%       |
| C granular  | 5%         | 4%           | 2%            | 5%                | 2%        | 3%   | 2%       |
| Pd/C 10%    | 5%         | 3%           | 2%            | 5%                | 2%        | 2%   | 3%       |

#### Second set of experiments

| Catalyst    | Sugar beet | Pine needles | Vermi-compost | Sugarcane bagasse | Cellulose | Cork | Softwood |
|-------------|------------|--------------|---------------|-------------------|-----------|------|----------|
| No catalyst | 4%         | 4%           | 2%            | 5%                | 2%        | 3%   | 3%       |
| C powder    | 2%         | 5%           | 1%            | 6%                | 2%        | 3%   | 3%       |
| Pd/C 5%     | 4%         | 3%           | 1%            | 5%                | 1%        | 2%   | 2%       |
| Ru/C 5%     | 4%         | 3%           | 2%            | 5%                | 2%        | 2%   | 2%       |
| C granular  | 1%         | 4%           | 2%            | 5%                | 2%        | 3%   | 2%       |
| Pd/C 10%    | 4%         | 3%           | 1%            | 5%                | 2%        | 3%   | 3%       |

### Average yields of acetic acid

| Catalyst    |                    | Sugar beet | Pine needles | Vermi-compost | Sugarcane bagasse | Cellulose | Cork | Softwood |
|-------------|--------------------|------------|--------------|---------------|-------------------|-----------|------|----------|
| No catalyst | Average            | 4%         | 3%           | 2%            | 4%                | 2%        | 3%   | 3%       |
|             | Standard deviation | 1%         | 1%           | 1%            | 1%                | 0%        | 0%   | 0%       |
| C powder    | Average            | 2%         | 4%           | 2%            | 5%                | 2%        | 3%   | 3%       |
|             | Standard deviation | 0%         | 1%           | 1%            | 1%                | 0%        | 1%   | 0%       |
| Pd/C 5%     | Average            | 5%         | 4%           | 2%            | 6%                | 2%        | 3%   | 2%       |
|             | Standard deviation | 1%         | 1%           | 1%            | 1%                | 1%        | 1%   | 0%       |
| Ru/C 5%     | Average            | 4%         | 3%           | 2%            | 5%                | 2%        | 2%   | 3%       |
|             | Standard deviation | 0%         | 0%           | 0%            | 0%                | 0%        | 0%   | 1%       |
| C granular  | Average            | 3%         | 4%           | 2%            | 5%                | 2%        | 3%   | 2%       |
|             | Standard deviation | 3%         | 0%           | 0%            | 0%                | 0%        | 0%   | 0%       |
| Pd/C 10%    | Average            | 5%         | 3%           | 2%            | 5%                | 2%        | 3%   | 3%       |
|             | Standard deviation | 1%         | 0%           | 1%            | 0%                | 0%        | 1%   | 0%       |

### 2.2 Variation of acetic acid yields with amount of biomass

Conditions: 0.5 M Sodium bicarbonate, 0.1 g Pd/C 5%, 300 °C, 4.5 ml of liquid solution

#### 0.025 g

| Repetition         | Sugar beet | Pine needles | Vermi-compost | Sugarcane bagasse | Cellulose | Cork | Softwood |
|--------------------|------------|--------------|---------------|-------------------|-----------|------|----------|
| 1                  | 1%         | 1%           | 0%            | 0%                | 0%        | 1%   | 1%       |
| 2                  | 1%         | 1%           | 0%            | 2%                | 0%        | 1%   | 1%       |
| Average            | 1%         | 1%           | 0%            | 1%                | 0%        | 1%   | 1%       |
| Standard deviation | 0%         | 0%           | 0%            | 1%                | 0%        | 0%   | 0%       |

#### 0.05 g

| Repetition         | Sugar beet | Pine needles | Vermi-compost | Sugarcane bagasse | Cellulose | Cork | Softwood |
|--------------------|------------|--------------|---------------|-------------------|-----------|------|----------|
| 1                  | 2%         | 0%           | 1%            | 2%                | 1%        | 0%   | 1%       |
| 2                  | 2%         | 2%           | 1%            | 2%                | 1%        | 0%   | 1%       |
| Average            | 2%         | 1%           | 1%            | 2%                | 1%        | 0%   | 1%       |
| Standard deviation | 0%         | 1%           | 0%            | 0%                | 0%        | 0%   | 0%       |

**0.1 g**

| Repetition         | Sugar beet | Pine needles | Vermi-compost | Sugarcane bagasse | Cellulose | Cork | Softwood |
|--------------------|------------|--------------|---------------|-------------------|-----------|------|----------|
| 1                  | 4%         | 3%           | 1%            | 5%                | 1%        | 2%   | 2%       |
| 2                  | 6%         | 5%           | 3%            | 7%                | 3%        | 3%   | 2%       |
| Average            | 5%         | 4%           | 2%            | 6%                | 2%        | 3%   | 2%       |
| Standard deviation | 1%         | 1%           | 1%            | 1%                | 1%        | 1%   | 0%       |

**2.3 Variation of acetic acid yields with temperature**

**Conditions:** 0.5 M Sodium bicarbonate, 0.1 g biomass, 4.5 ml of liquid solution, 0.1 g Pd/C 5%

**200°C**

| Repetition         | Sugar beet | Pine needles | Vermi-compost | Sugarcane bagasse | Cellulose | Cork | Softwood |
|--------------------|------------|--------------|---------------|-------------------|-----------|------|----------|
| 1                  | 3%         | 1%           | 3%            | 3%                | 1%        | 2%   | 1%       |
| 2                  | 4%         | 2%           | 0%            | 3%                | 0%        | 2%   | 2%       |
| Average            | 3%         | 1%           | 2%            | 3%                | 0%        | 2%   | 1%       |
| Standard deviation | 0%         | 1%           | 2%            | 0%                | 0%        | 0%   | 0%       |

**250°C**

| Repetition         | Sugar beet | Pine needles | Vermi-compost | Sugarcane bagasse | Cellulose | Cork | Softwood |
|--------------------|------------|--------------|---------------|-------------------|-----------|------|----------|
| 1                  | 4%         | 2%           | 1%            | 4%                | 1%        | 2%   | 1%       |
| 2                  | 3%         | 2%           | 1%            | 4%                | 1%        | 2%   | 2%       |
| Average            | 4%         | 2%           | 1%            | 4%                | 1%        | 2%   | 2%       |
| Standard deviation | 0%         | 0%           | 0%            | 0%                | 0%        | 0%   | 1%       |

**300°C**

| Repetition         | Sugar beet | Pine needles | Vermi-compost | Sugarcane bagasse | Cellulose | Cork | Softwood |
|--------------------|------------|--------------|---------------|-------------------|-----------|------|----------|
| 1                  | 6%         | 5%           | 3%            | 7%                | 3%        | 3%   | 2%       |
| 2                  | 4%         | 3%           | 1%            | 5%                | 1%        | 2%   | 2%       |
| Average            | 5%         | 4%           | 2%            | 6%                | 2%        | 3%   | 2%       |
| Standard deviation | 1%         | 1%           | 1%            | 1%                | 1%        | 1%   | 0%       |

### 3. LACTIC ACID

#### 3.1 Lactic acid for different catalysts and biomass

Conditions: 0.5 M Sodium bicarbonate, 0.1 g biomass, 300 °C, 4.5 ml of liquid solution

##### First set of experiments

| Catalyst    | Sugar beet | Pine needles | Vermi-compost | Sugarcane bagasse | Cellulose | Cork | Softwood |
|-------------|------------|--------------|---------------|-------------------|-----------|------|----------|
| No catalyst | 10%        | 5%           | 1%            | 9%                | 10%       | 6%   | 14%      |
| C powder    | 2%         | 6%           | 1%            | 4%                | 12%       | 5%   | 9%       |
| Pd/C 5%     | 10%        | 5%           | 2%            | 9%                | 4%        | 3%   | 5%       |
| Ru/C 5%     | 9%         | 6%           | 2%            | 6%                | 2%        | 3%   | 4%       |
| C granular  | 16%        | 7%           | 2%            | 16%               | 13%       | 6%   | 12       |
| Pd/C 10%    | 14%        | 6%           | 2%            | 13%               | 5%        | 3%   | 6%       |

##### Second set of experiments

| Catalyst    | Sugar beet | Pine needles | Vermi-compost | Sugarcane bagasse | Cellulose | Cork | Softwood |
|-------------|------------|--------------|---------------|-------------------|-----------|------|----------|
| No catalyst | 17%        | 9%           | 2%            | 9%                | 13%       | 6%   | 8%       |
| C powder    | 2%         | 7%           | 2%            | 4%                | 13%       | 6%   | 14%      |
| Pd/C 5%     | 3%         | 13%          | 1%            | 6%                | 4%        | 2%   | 3%       |
| Ru/C 5%     | 5%         | 6%           | 2%            | 8%                | 1%        | 3%   | 4%       |
| C granular  | 16%        | 8%           | 2%            | 14%               | 12%       | 6%   | 12%      |
| Pd/C 10%    | 10%        | 6%           | 1%            | 9%                | 5%        | 3%   | 6%       |

##### Average yields of lactic acid

| Catalyst    |                    | Sugar beet | Pine needles | Vermi-compost | Sugarcane bagasse | Cellulose | Cork | Softwood |
|-------------|--------------------|------------|--------------|---------------|-------------------|-----------|------|----------|
| No catalyst | Average            | 14%        | 7%           | 2%            | 9%                | 12%       | 6%   | 11%      |
|             | Standard deviation | 5%         | 3%           | 1%            | 0%                | 2%        | 0%   | 4%       |
| C powder    | Average            | 2%         | 7%           | 2%            | 4%                | 13%       | 6%   | 12%      |
|             | Standard deviation | 0%         | 1%           | 1%            | 0%                | 1%        | 1%   | 4%       |
| Pd/C 5%     | Average            | 7%         | 9%           | 2%            | 8%                | 4%        | 3%   | 4%       |
|             | Standard deviation | 5%         | 6%           | 1%            | 2%                | 0%        | 1%   | 1%       |
| Ru/C 5%     | Average            | 7%         | 6%           | 2%            | 7%                | 2%        | 3%   | 4%       |
|             | Standard deviation | 3%         | 0%           | 0%            | 1%                | 1%        | 0%   | 0%       |
| C granular  | Average            | 16%        | 8%           | 2%            | 15%               | 13%       | 6%   | 12%      |
|             | Standard deviation | 0%         | 1%           | 0%            | 1%                | 1%        | 0%   | 0%       |
| Pd/C 10%    | Average            | 12%        | 6%           | 2%            | 11%               | 5%        | 3%   | 6%       |
|             | Standard deviation | 3%         | 0%           | 1%            | 3%                | 0%        | 0%   | 0%       |

### 3.2 Variation of lactic acid yields with amount of biomass

Conditions: 0.5 M Sodium bicarbonate, 0.1 g Pd/C 5%, 300 °C, 4.5 ml of liquid solution

#### 0.025 g

| Repetition         | Sugar beet | Pine needles | Vermi-compost | Sugarcane bagasse | Cellulose | Cork | Softwood |
|--------------------|------------|--------------|---------------|-------------------|-----------|------|----------|
| 1                  | 1%         | 0%           | 0%            | 0%                | 0%        | 0%   | 1%       |
| 2                  | 1%         | 0%           | 0%            | 2%                | 0%        | 0%   | 1%       |
| Average            | 1%         | 0%           | 0%            | 1%                | 0%        | 0%   | 1%       |
| Standard deviation | 0%         | 0%           | 0%            | 1%                | 0%        | 0%   | 0%       |

#### 0.05 g

| Repetition         | Sugar beet | Pine needles | Vermi-compost | Sugarcane bagasse | Cellulose | Cork | Softwood |
|--------------------|------------|--------------|---------------|-------------------|-----------|------|----------|
| 1                  | 4%         | 1%           | 1%            | 2%                | 2%        | 0%   | 2%       |
| 2                  | 4%         | 3%           | 1%            | 4%                | 2%        | 0%   | 2%       |
| Average            | 4%         | 2%           | 1%            | 3%                | 2%        | 0%   | 2%       |
| Standard deviation | 0%         | 1%           | 0%            | 1%                | 0%        | 0%   | 0%       |

#### 0.1 g

| Repetition         | Sugar beet | Pine needles | Vermi-compost | Sugarcane bagasse | Cellulose | Cork | Softwood |
|--------------------|------------|--------------|---------------|-------------------|-----------|------|----------|
| 1                  | 3%         | 13%          | 1%            | 6%                | 4%        | 2%   | 3%       |
| 2                  | 10%        | 6%           | 1%            | 9%                | 5%        | 3%   | 6%       |
| Average            | 12%        | 6%           | 2%            | 11%               | 5%        | 3%   | 6%       |
| Standard deviation | 3%         | 0%           | 1%            | 3%                | 0%        | 0%   | 0%       |

### 3.3 Variation of lactic acid yields with temperature

Conditions: 0.5 M Sodium bicarbonate, 0.1 g biomass, 4.5 ml of liquid solution, 0.1 g Pd/C 5%

#### 200°C

| Repetition         | Sugar beet | Pine needles | Vermi-compost | Sugarcane bagasse | Cellulose | Cork | Softwood |
|--------------------|------------|--------------|---------------|-------------------|-----------|------|----------|
| 1                  | 4%         | 2%           | 0%            | 1%                | 2%        | 1%   | 1%       |
| 2                  | 3%         | 2%           | 1%            | 1%                | 1%        | 5%   | 1%       |
| Average            | 4%         | 2%           | 0%            | 1%                | 2%        | 3%   | 1%       |
| Standard deviation | 1%         | 0%           | 0%            | 0%                | 1%        | 3%   | 0%       |



**250°C**

| Repetition         | Sugar beet | Pine needles | Vermi-compost | Sugarcane bagasse | Cellulose | Cork | Softwood |
|--------------------|------------|--------------|---------------|-------------------|-----------|------|----------|
| 1                  | 10%        | 6%           | 1%            | 7%                | 3%        | 1%   | 5%       |
| 2                  | 8%         | 5%           | 1%            | 6%                | 3%        | 2%   | 3.0%     |
| Average            | 9%         | 6%           | 1%            | 7%                | 3%        | 2%   | 4%       |
| Standard deviation | 1%         | 1%           | 0%            | 1%                | 0%        | 1%   | 1%       |

**300°C**

| Repetition         | Sugar beet | Pine needles | Vermi-compost | Sugarcane bagasse | Cellulose | Cork | Softwood |
|--------------------|------------|--------------|---------------|-------------------|-----------|------|----------|
| 1                  | 10%        | 5%           | 2%            | 9%                | 4%        | 3%   | 5%       |
| 2                  | 3%         | 13%          | 1%            | 6%                | 4%        | 2%   | 3%       |
| Average            | 7%         | 9%           | 2%            | 8%                | 4%        | 3%   | 4%       |
| Standard deviation | 5%         | 6%           | 1%            | 2%                | 0%        | 1%   | 1%       |

#### 4. NMR DIAGRAMS

**Conditions:**  $^{13}\text{C}$ - $\text{NaHCO}_3$  0.5M, 0.1 g of biomass, 200°C and 300°C, 4.5 ml of liquid solution.

##### 1<sup>st</sup> EXPERIMENTS AT 300°C

##### Sugarbeet, Pd/C 5%, 300°C, carbon spectra

Maira-B118\_CARBON\_01  
STANDARD CARBON PARAMETERS

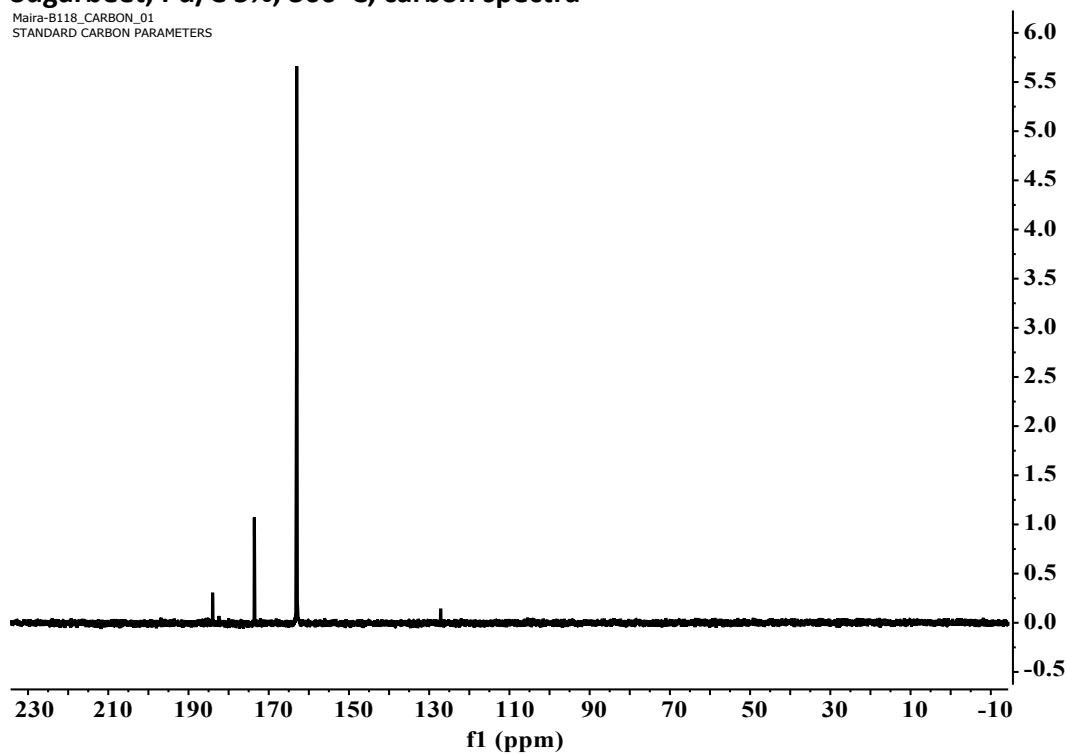

##### Sugarbeet, Pd/C 5%, 300°C, proton spectra

Maira-B118\_PRESAT\_01

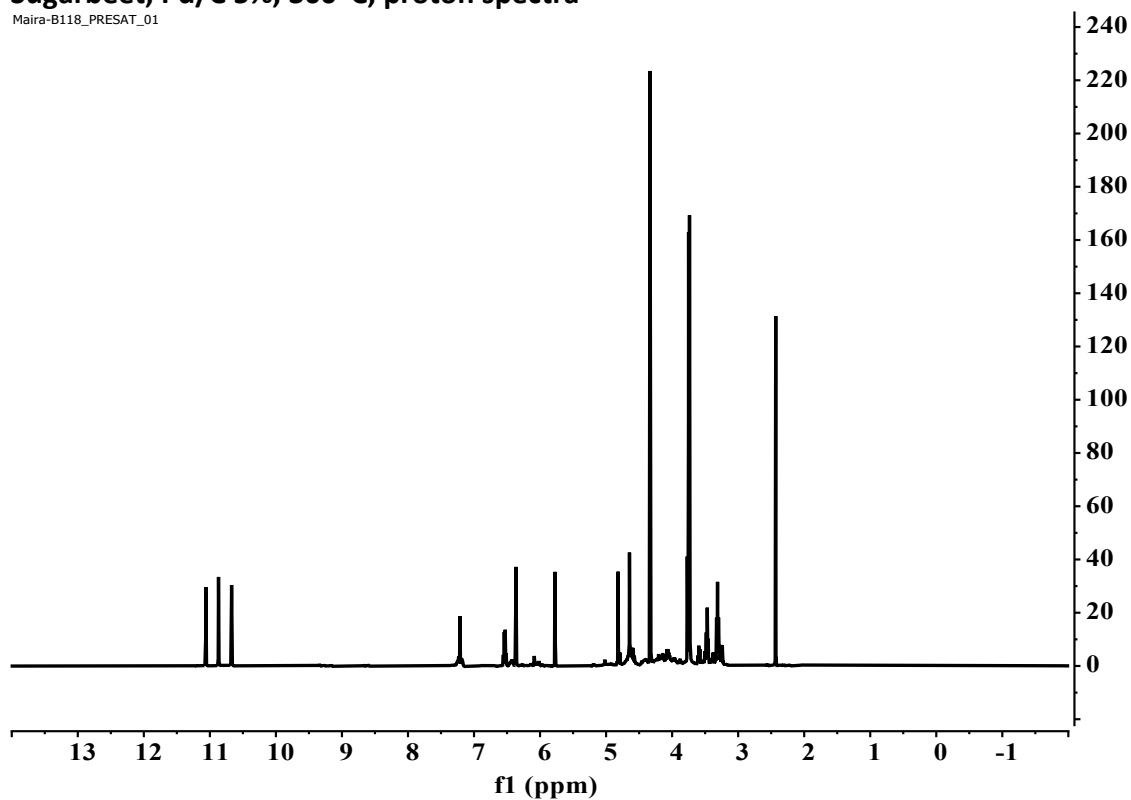

**Pine needles, Pd/C 5%, 300°C, carbon spectra**

Maira-B119\_CARBN\_01  
STANDARD CARBON PARAMETERS

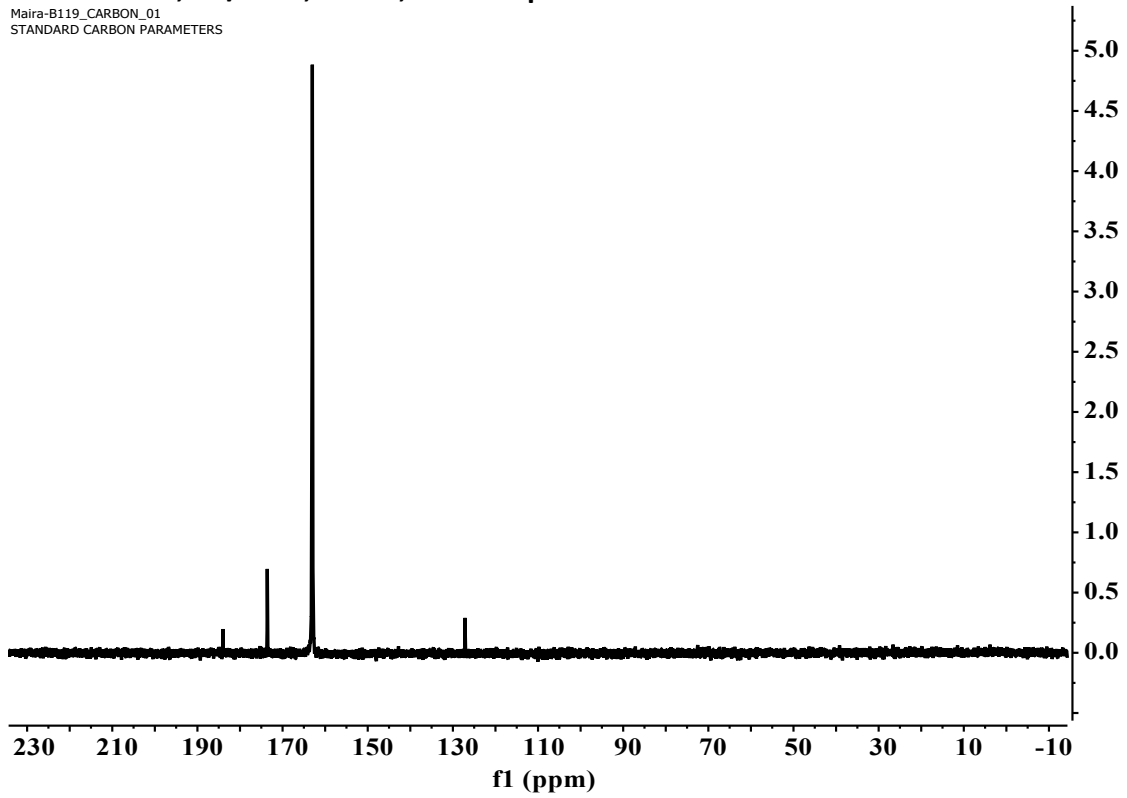

**Pine needles, Pd/C 5%, 300°C, proton spectra**

Maira-B119\_PRESAT\_01  
STANDARD PROTON PARAMETERS

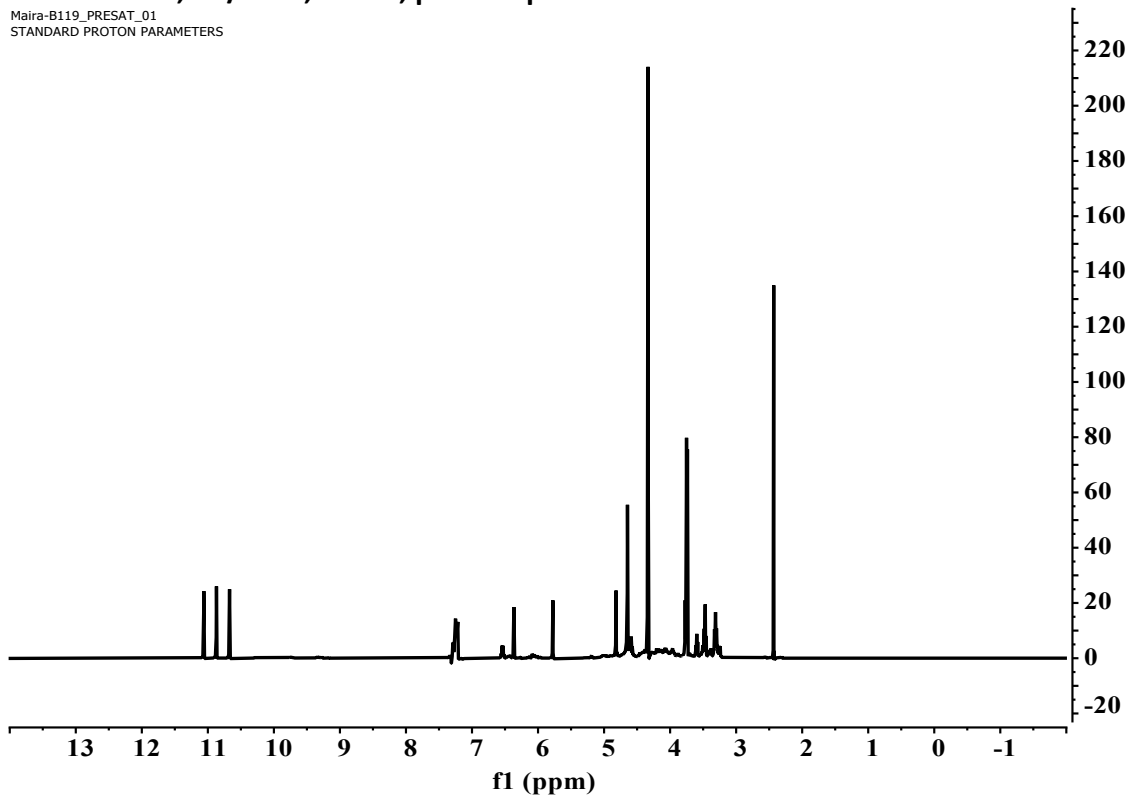

### Vermicompost, Pd/C 5%, 300°C, carbon spectra

Maira-B120\_CARBON\_01  
STANDARD CARBON PARAMETERS

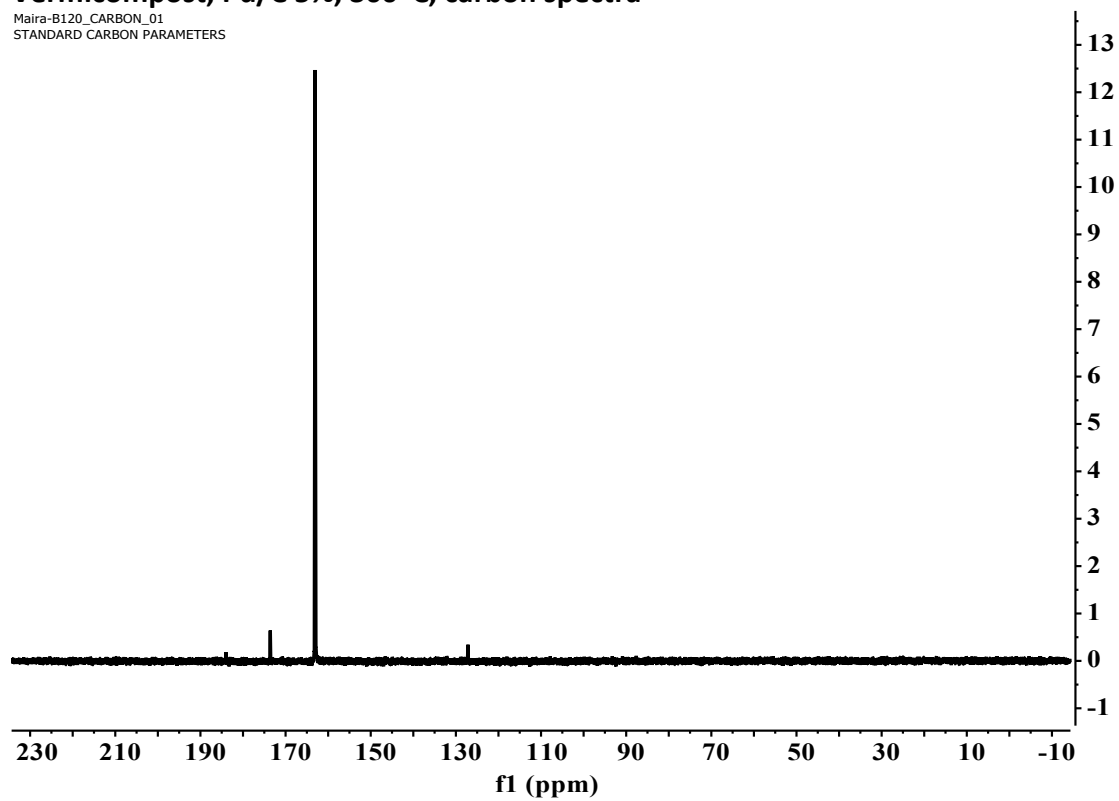

### Vermicompost, Pd/C 5%, 300°C, proton spectra

Maira-B120\_PRESAT\_01  
STANDARD PROTON PARAMETERS

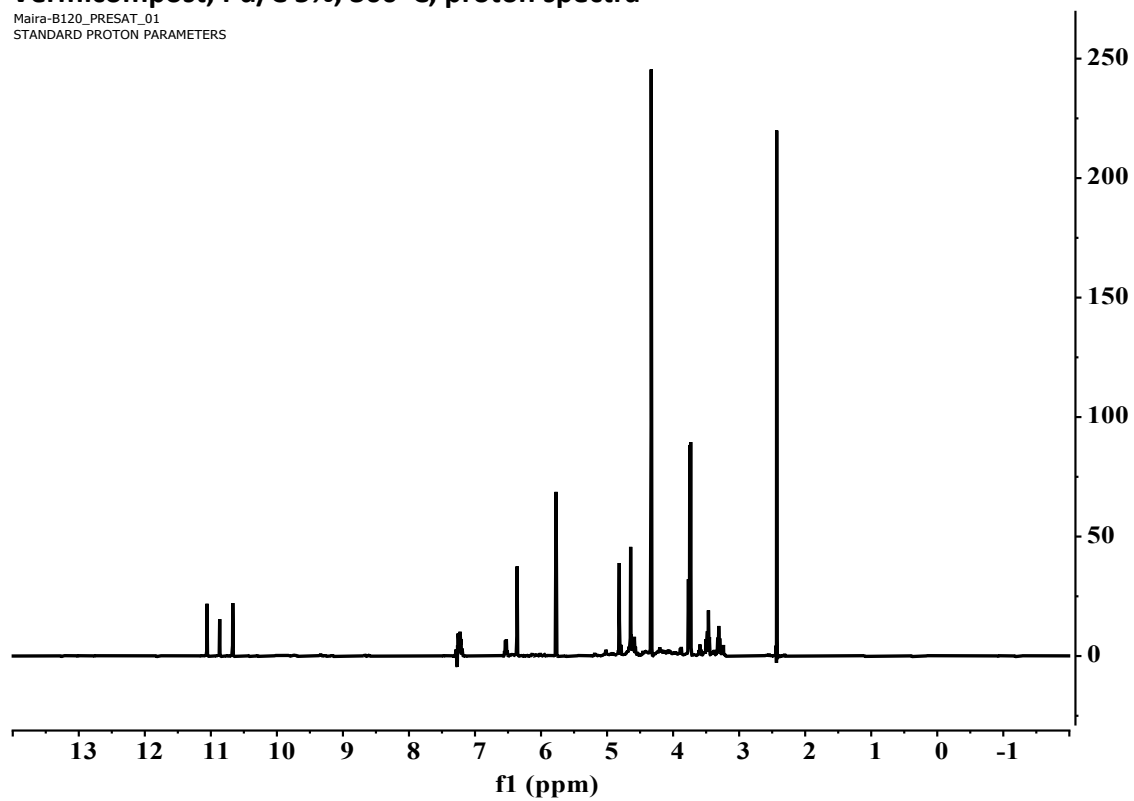

### Sugarcane bagasse, Pd/C 5%, 300°C, carbon spectra

Maira-B121\_CARBON\_01  
STANDARD CARBON PARAMETERS

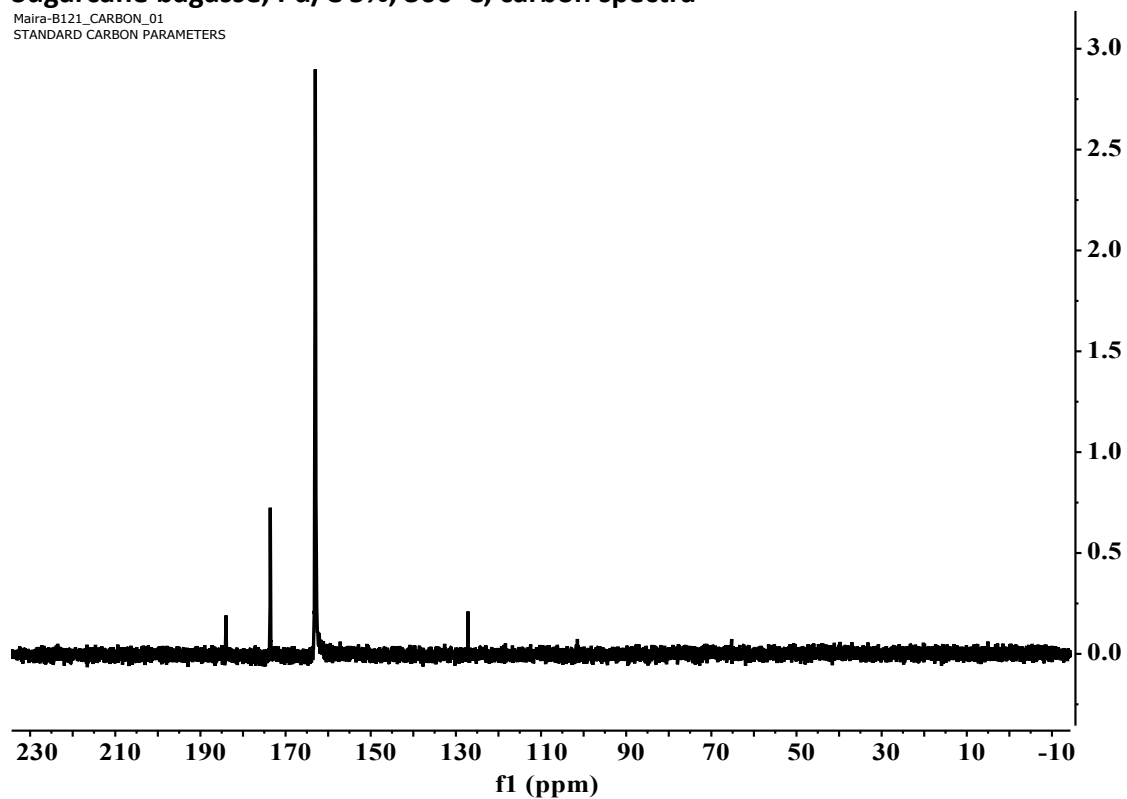

### Sugarcane bagasse, Pd/C 5%, 300°C, proton spectra

Maira-B121\_PRESAT\_01  
STANDARD PROTON PARAMETERS

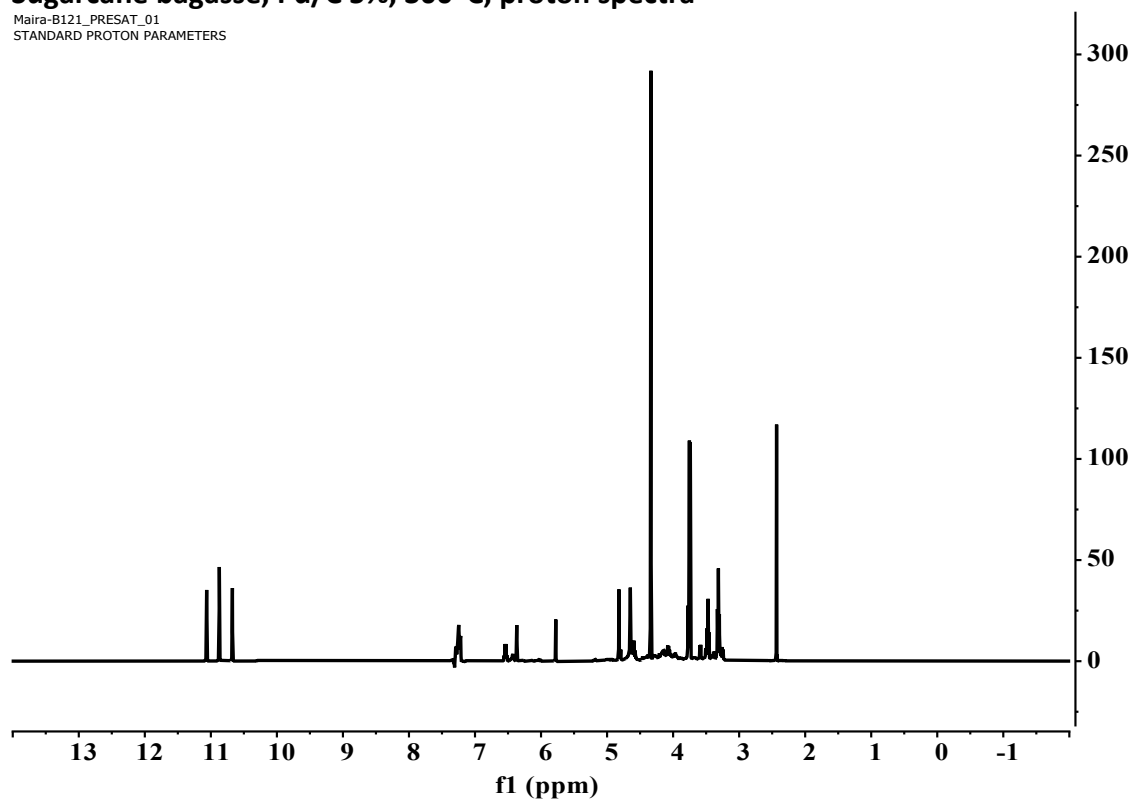

### Cellulose, Pd/C 5%, 300°C, carbon spectra

Maira-B122\_CARON\_01  
STANDARD CARBON PARAMETERS

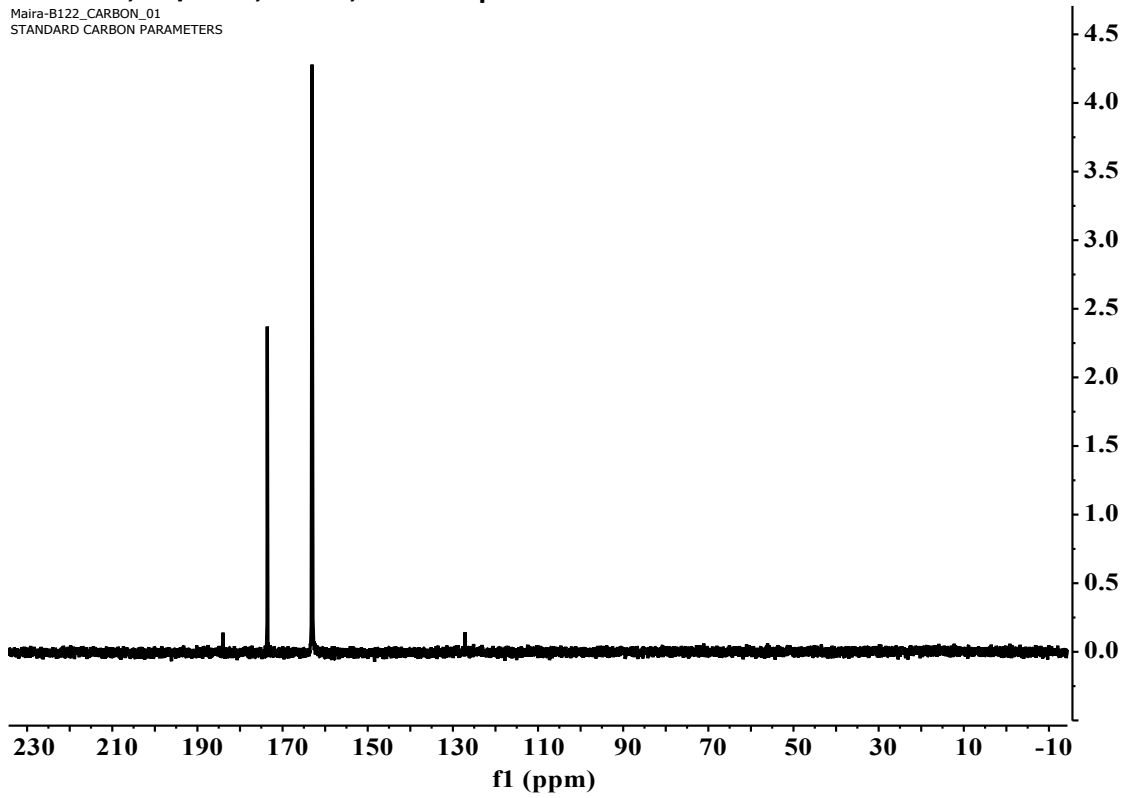

### Cellulose, Pd/C 5%, 300°C, proton spectra

Maira-B122\_PRESAT\_01  
STANDARD PROTON PARAMETERS

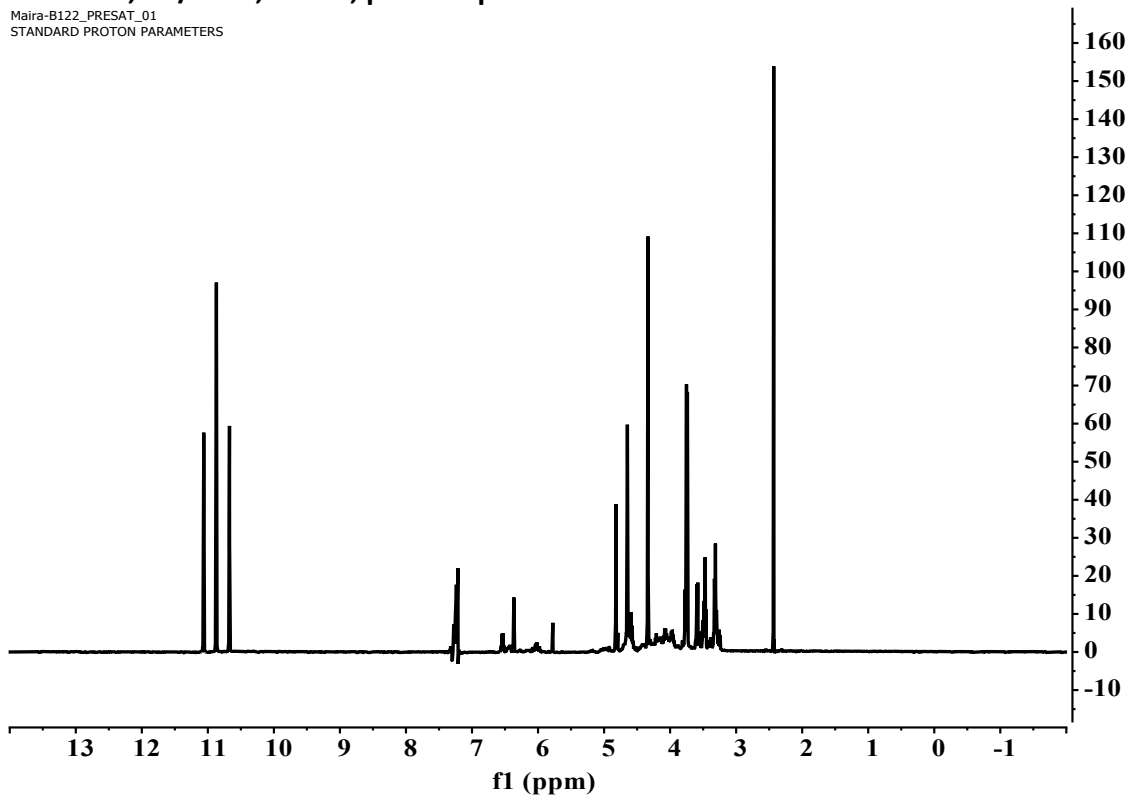

### Cork, Pd/C 5%, 300°C, carbon spectra

Maira-B123\_CARBN\_01  
STANDARD CARBON PARAMETERS

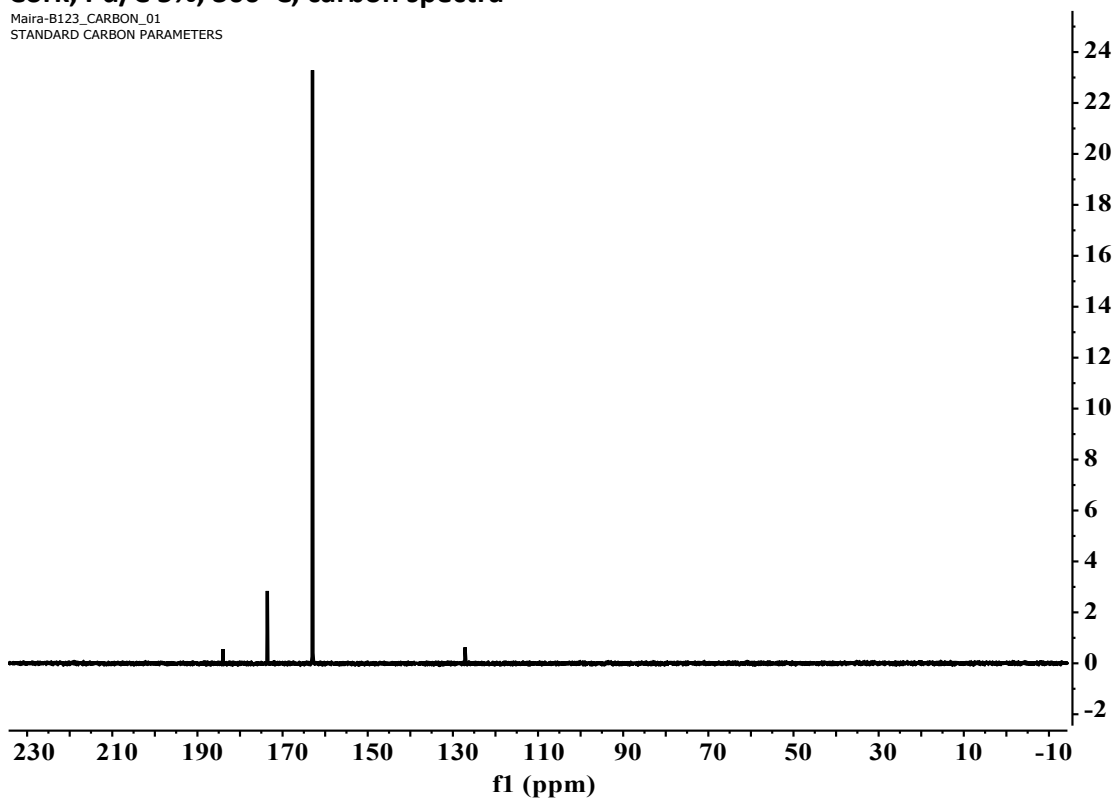

### Cork, Pd/C 5%, 300°C, proton spectra

Maira-B123\_PRESAT\_01  
STANDARD PROTON PARAMETERS

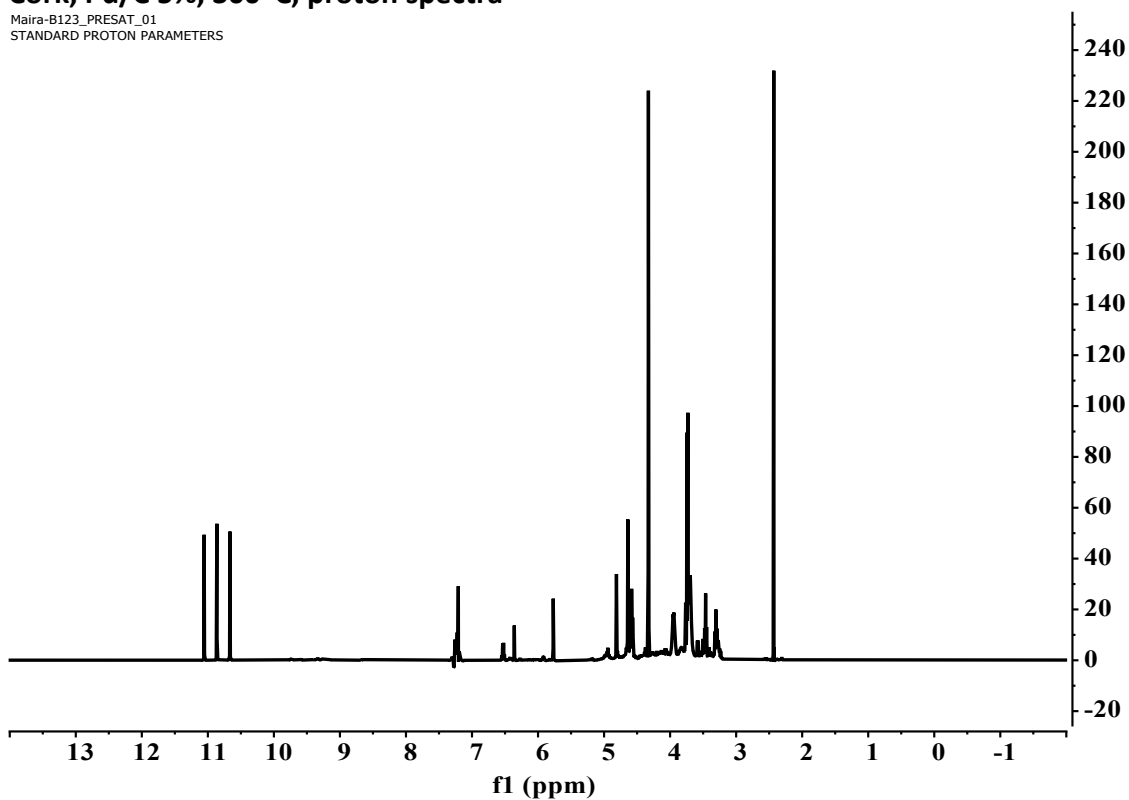

## 2<sup>nd</sup> EXPERIMENTS AT 300°C

### Sugarbeet, Pd/C 5%, 300°C, carbon spectra

Maira-338\_CARBON\_01  
STANDARD CARBON PARAMETERS

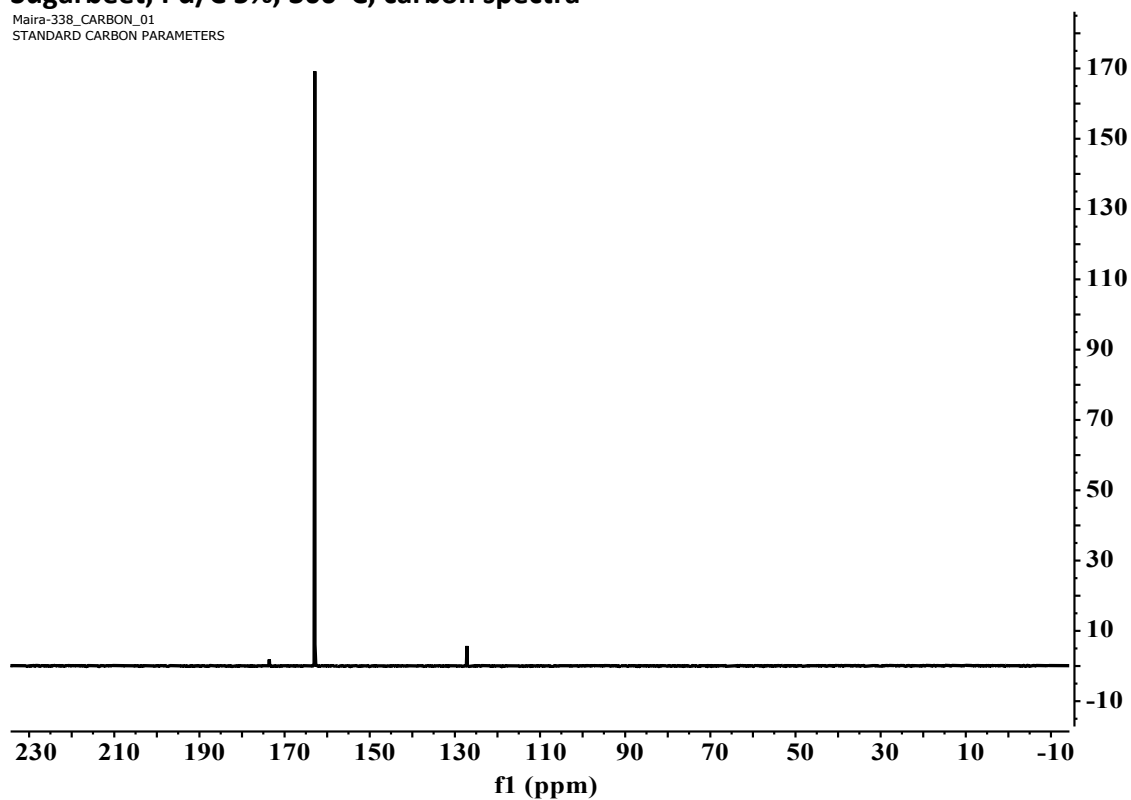

### Sugarbeet, Pd/C 5%, 300°C, proton spectra

Maira-338\_PRESAT\_02  
STANDARD PROTON PARAMETERS

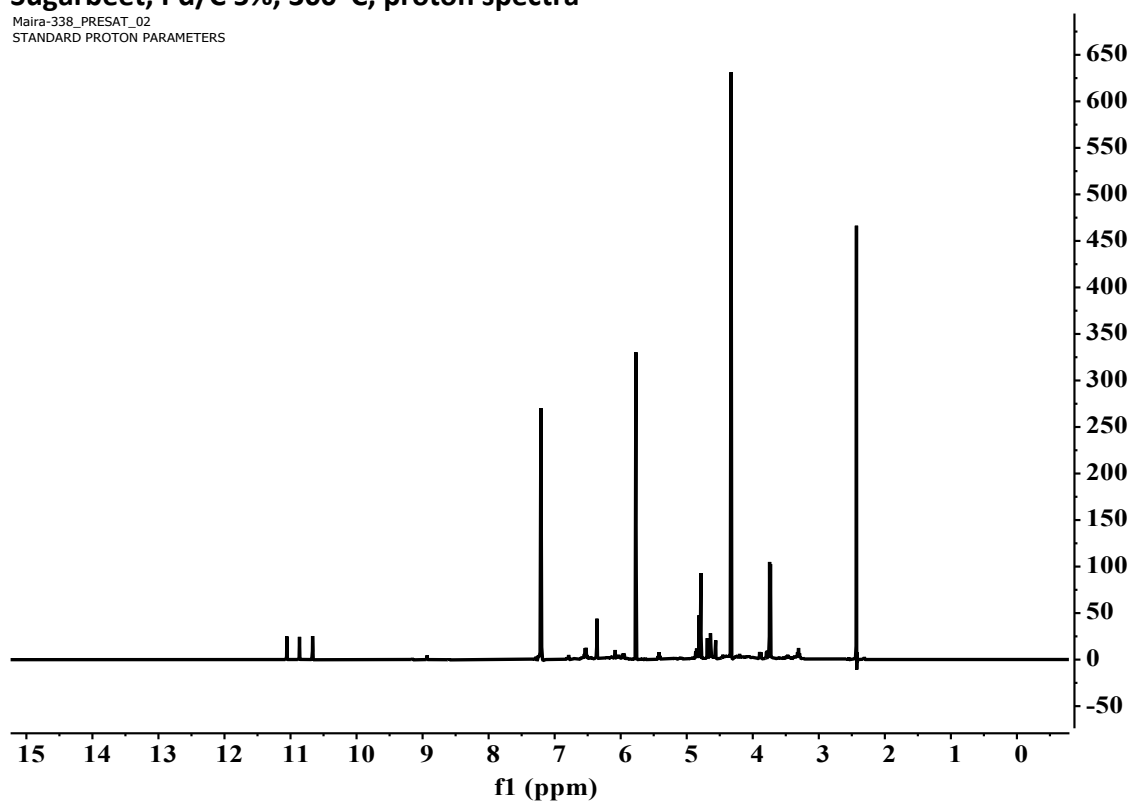



### Pine needles, Pd/C 5%, 300°C, carbon spectra

Maira-339\_CARBON\_01  
STANDARD CARBON PARAMETERS

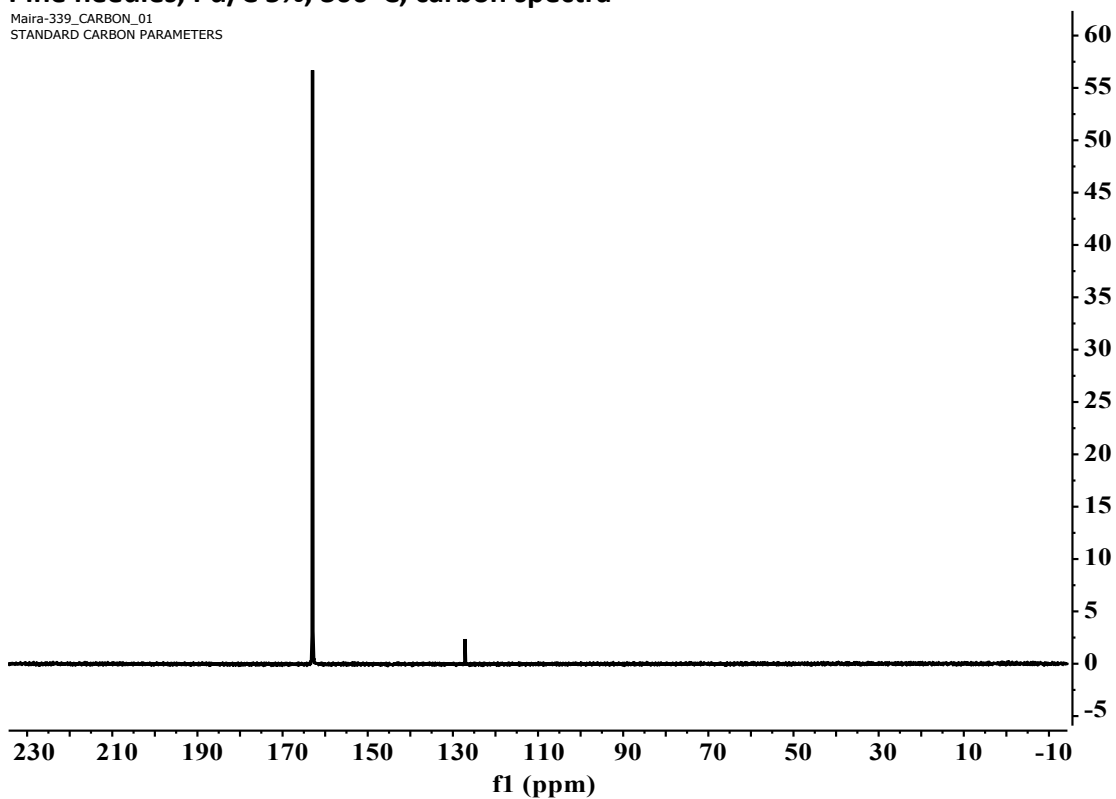

### Pine needles, Pd/C 5%, 300°C, proton spectra

Maira-339\_PRESAT\_01  
STANDARD PROTON PARAMETERS

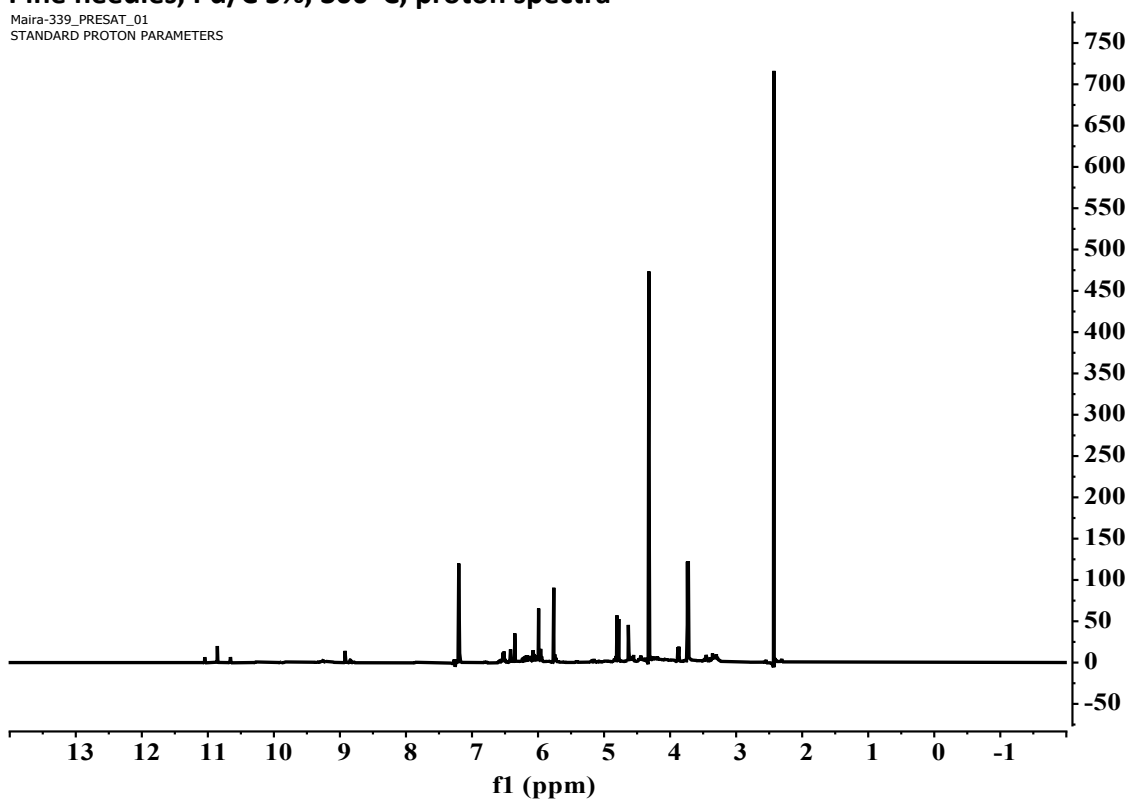

### Vermicompost, Pd/C 5%, 300°C, carbon spectra

Maira-340\_PRESAT\_01  
STANDARD PROTON PARAMETERS

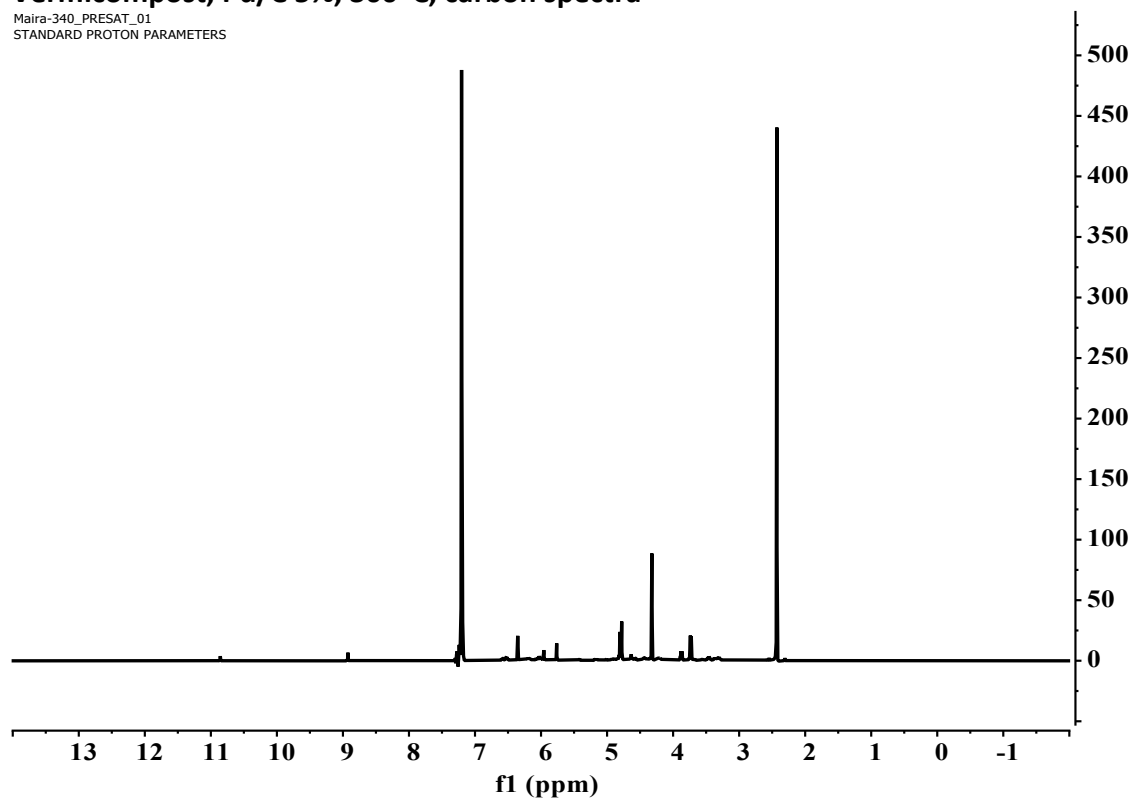

### Vermicompost, Pd/C 5%, 300°C, proton spectra

Maira-340\_CARBON\_01  
STANDARD CARBON PARAMETERS

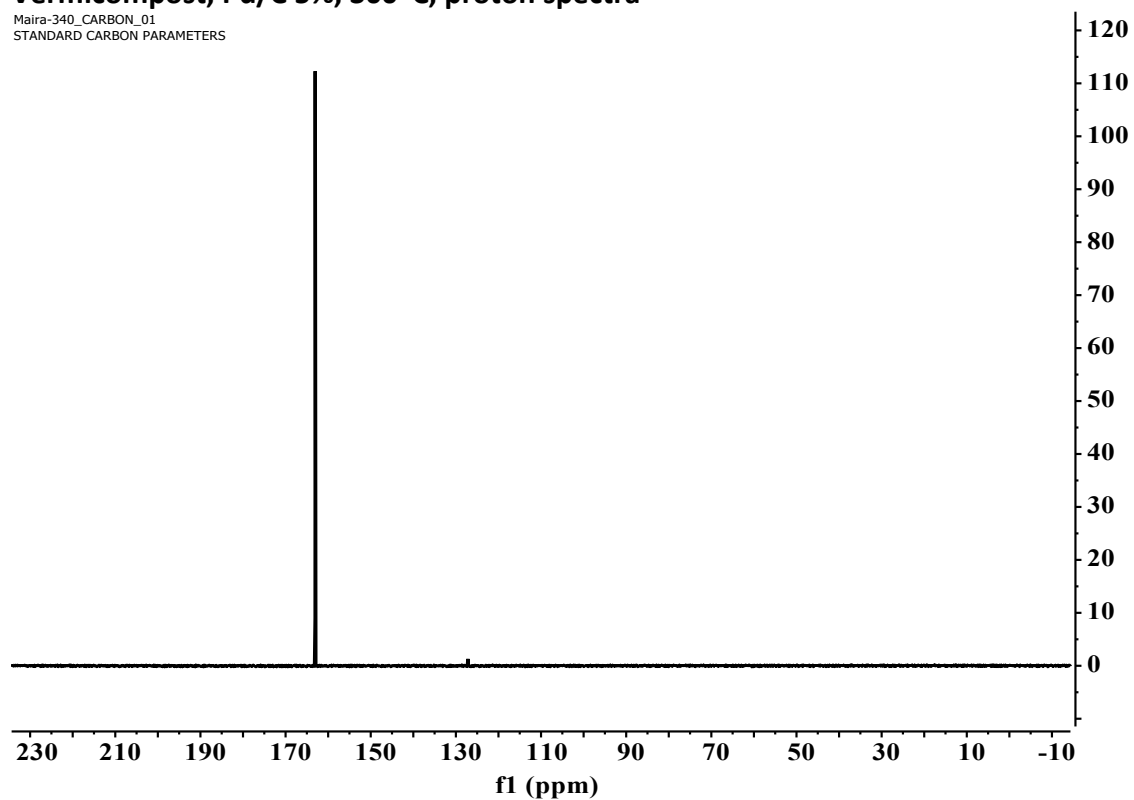

### Sugarcane bagasse, Pd/C 5%, 300°C, carbon spectra

Maira-341\_CARBON\_01  
STANDARD CARBON PARAMETERS

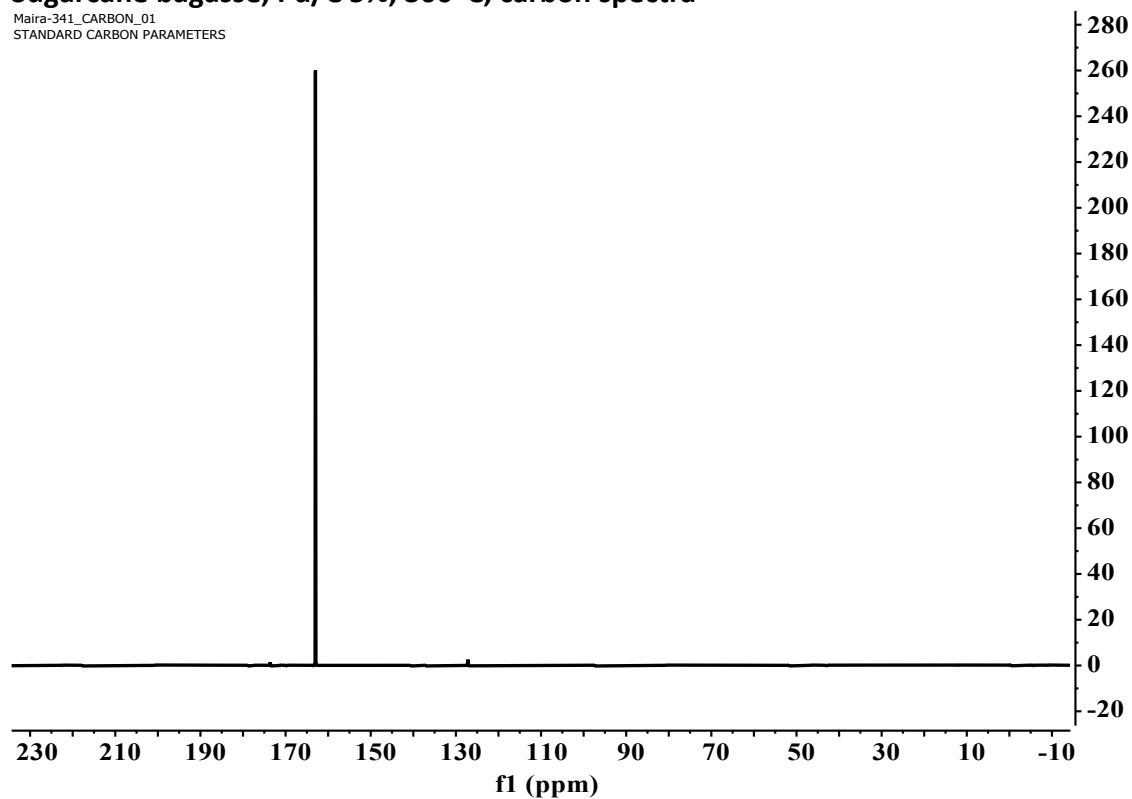

### Sugarcane bagasse, Pd/C 5%, 300°C, proton spectra

Maira-341\_PRESAT\_01  
STANDARD PROTON PARAMETERS

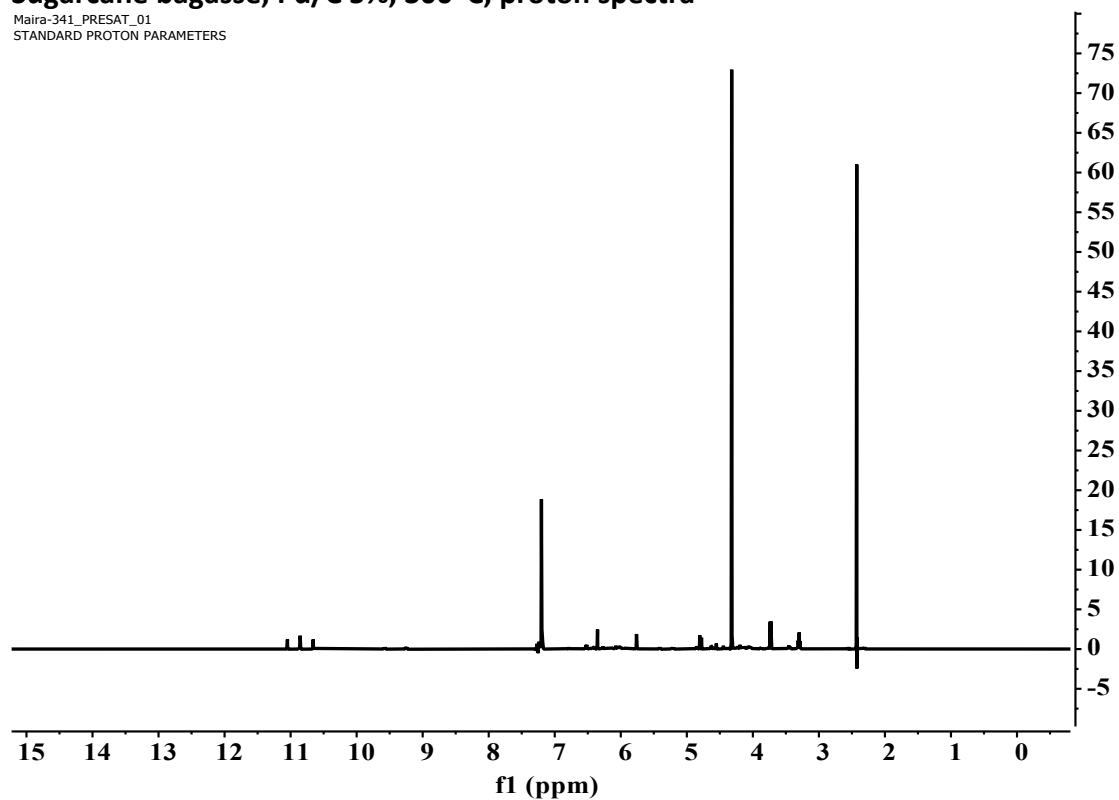

**Cellulose, Pd/C 5%, 300°C, carbon spectra**

Maira-342\_CARBON\_01  
STANDARD CARBON PARAMETERS

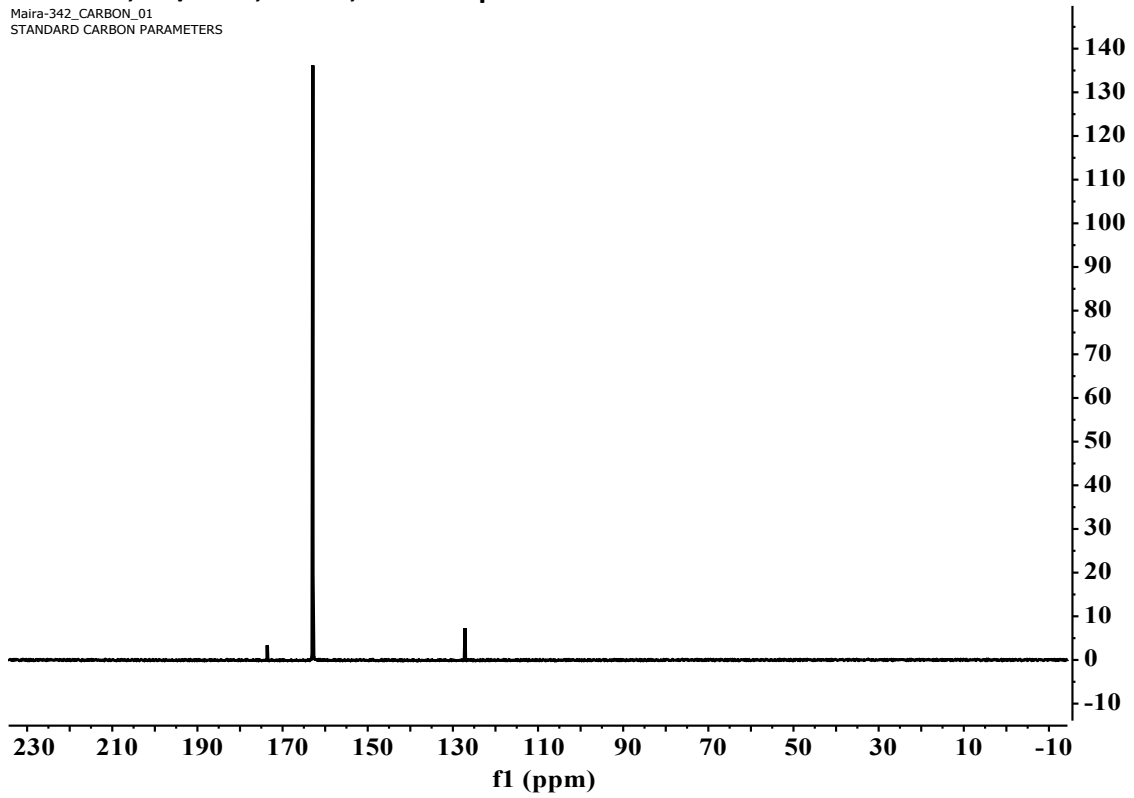

**Cellulose, Pd/C 5%, 300°C, carbon spectra**

Maira-342\_PRESAT\_01  
STANDARD PROTON PARAMETERS

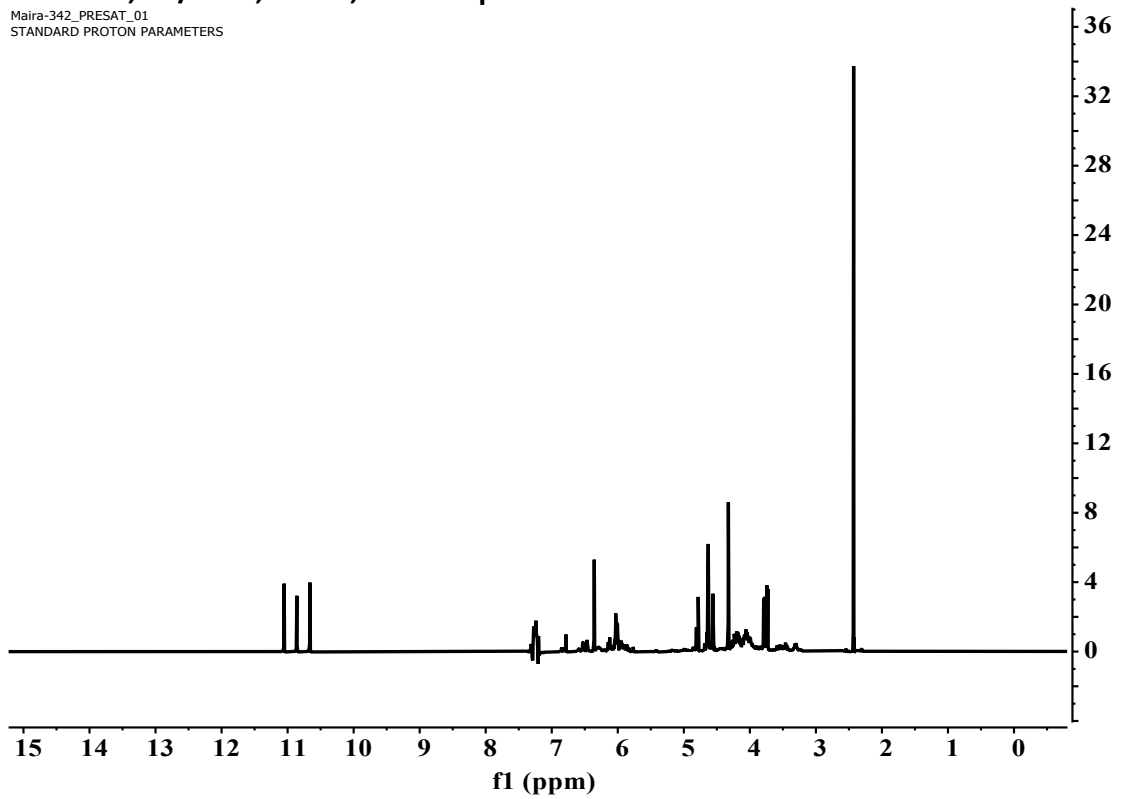

### Cork, Pd/C 5%, 300°C, carbon spectra

Maira-343\_CARBON\_01  
STANDARD CARBON PARAMETERS

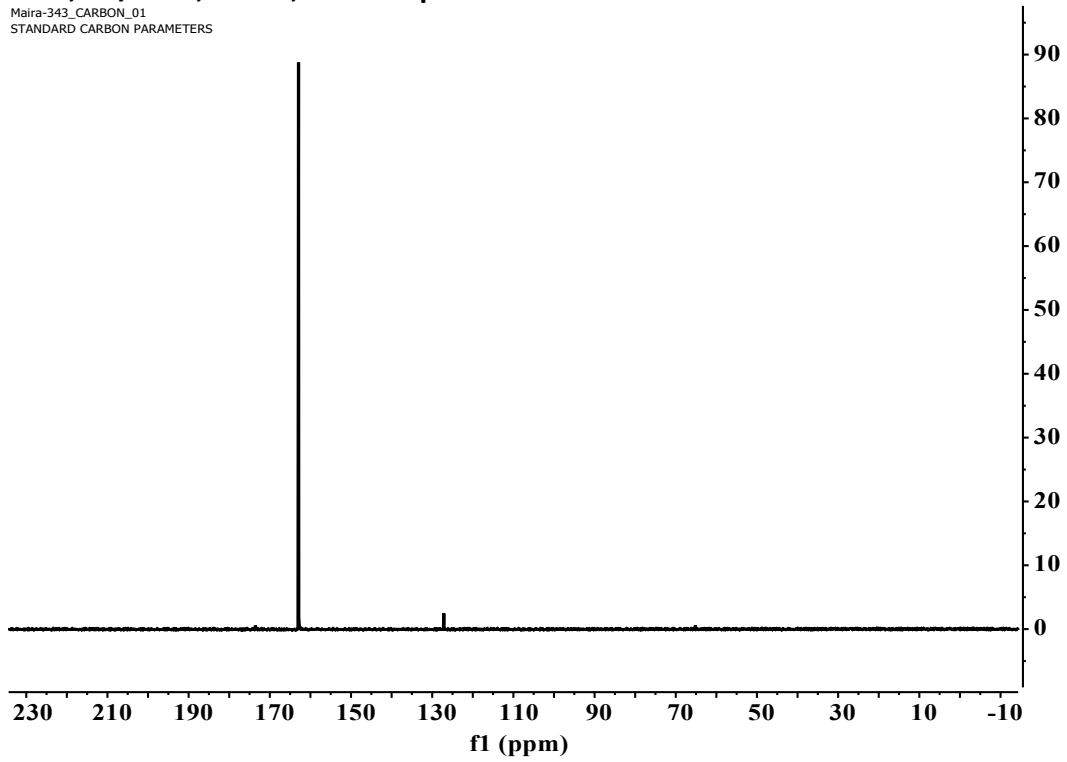

### Cork, Pd/C 5%, 300°C, proton spectra

Maira-343\_PRESAT\_02  
STANDARD PROTON PARAMETERS

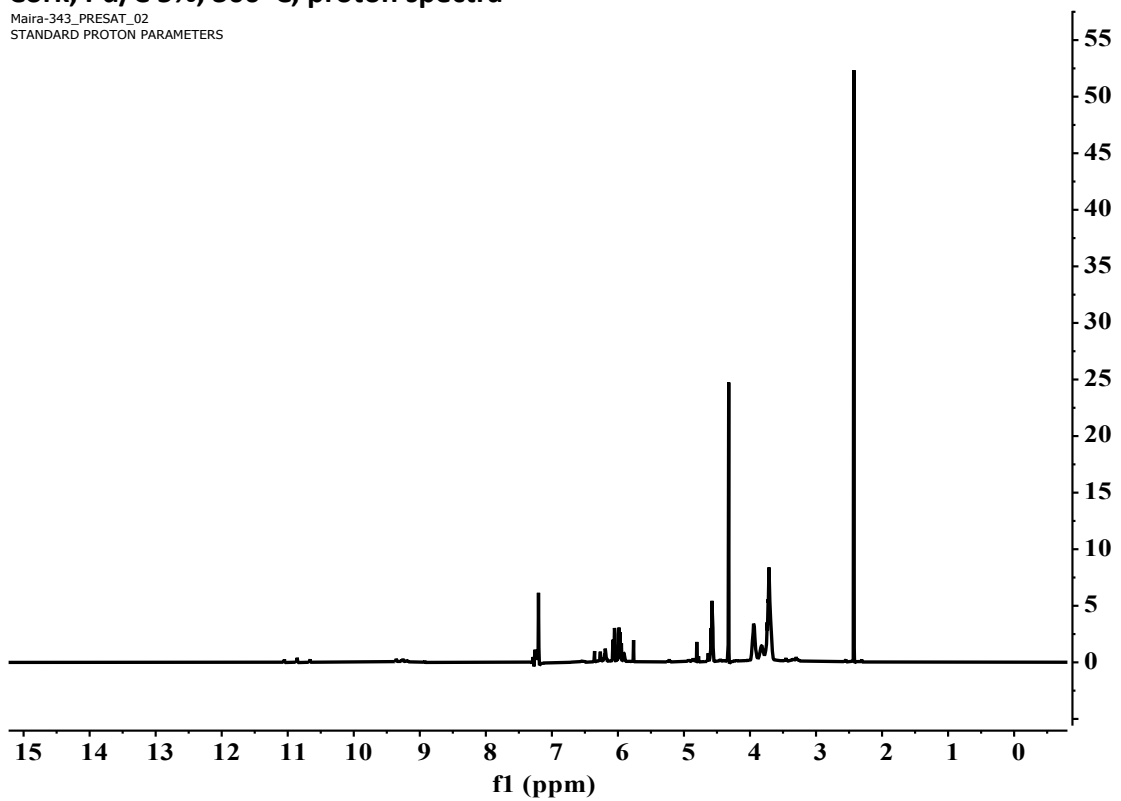

### Softwood, Pd/C 5%, 300°C, carbon spectra

Maira-344\_CARBON\_01  
STANDARD CARBON PARAMETERS

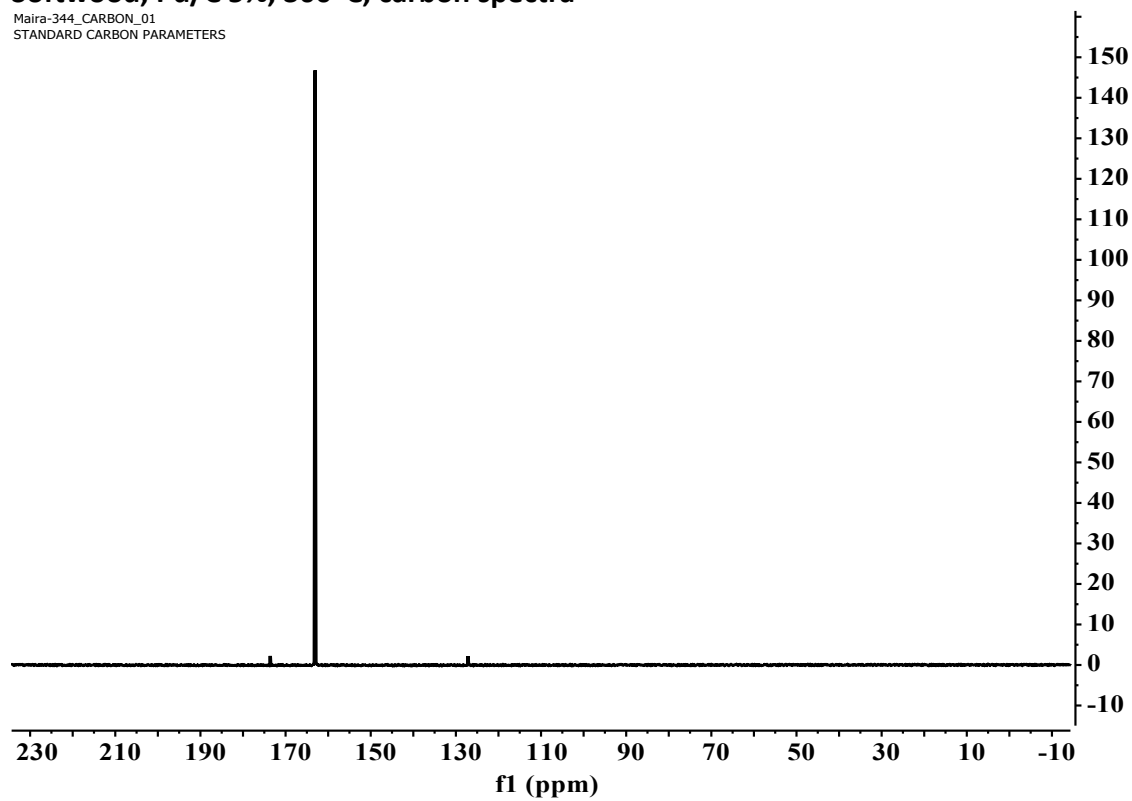

### Softwood, Pd/C 5%, 300°C, proton spectra

Maira-344\_PRESAT\_01  
STANDARD PROTON PARAMETERS

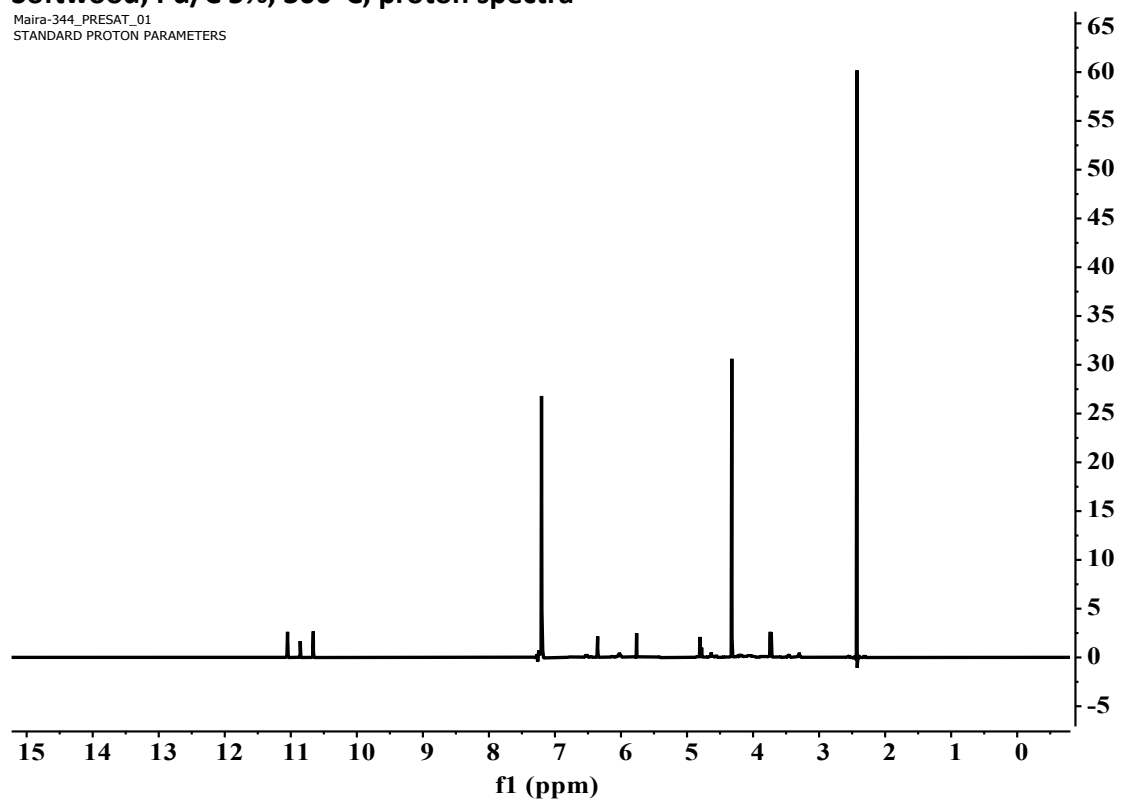

# 1<sup>st</sup> EXPERIMENTS AT 200°C

## Sugarbeet, Pd/C 5%, 200°C, carbon spectra

Maira-317\_CARBON\_01  
STANDARD CARBON PARAMETERS

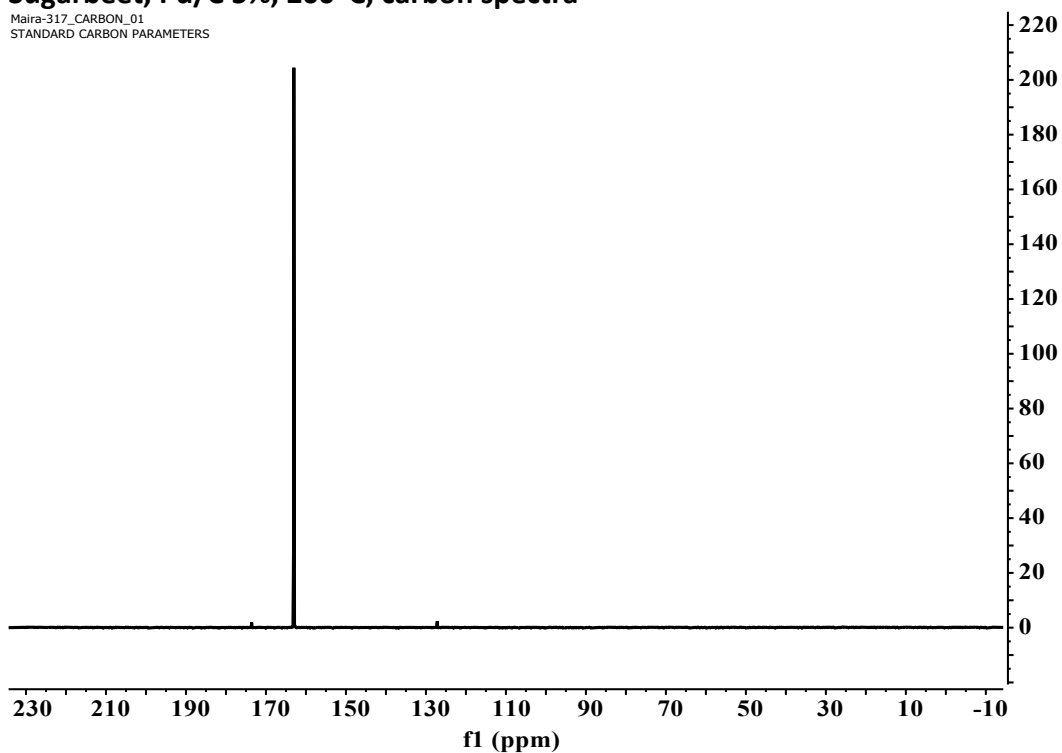

## Sugarbeet, Pd/C 5%, 200°C, proton spectra

Maira-317\_PRESAT\_01

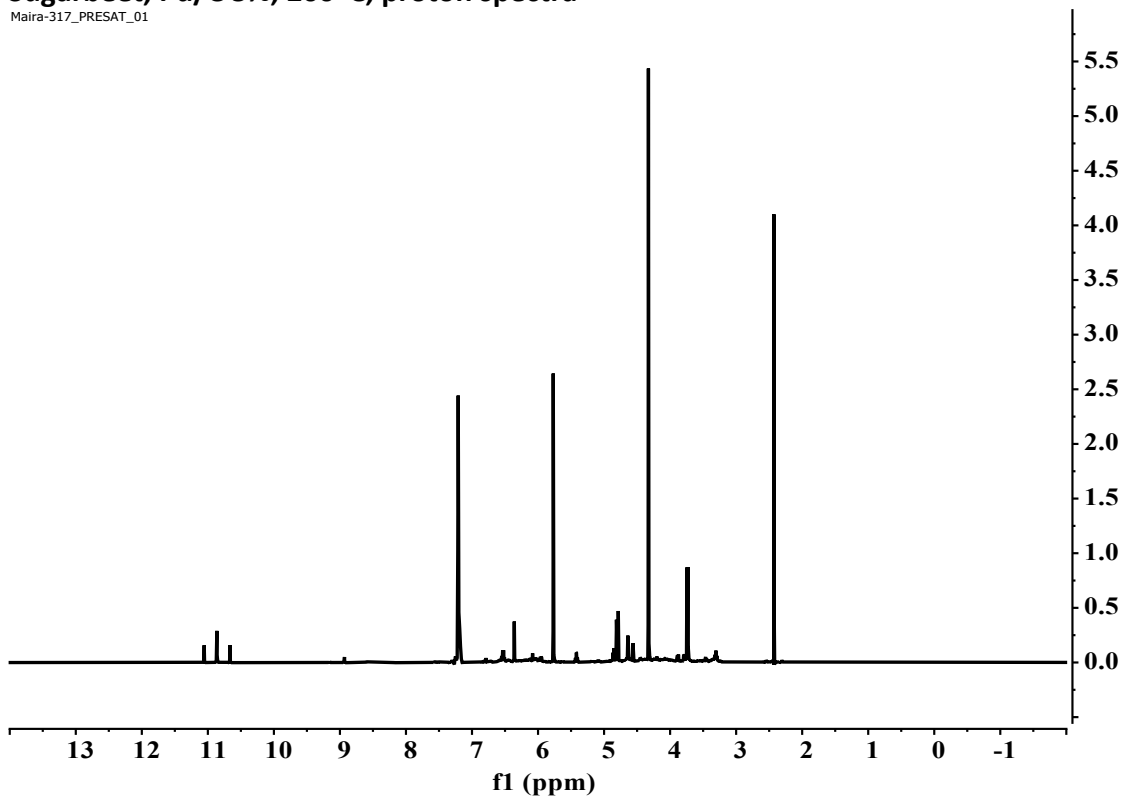

**Pine needles, Pd/C 5%, 200°C, carbon spectra**

Maira-318\_CARBON\_01  
STANDARD CARBON PARAMETERS

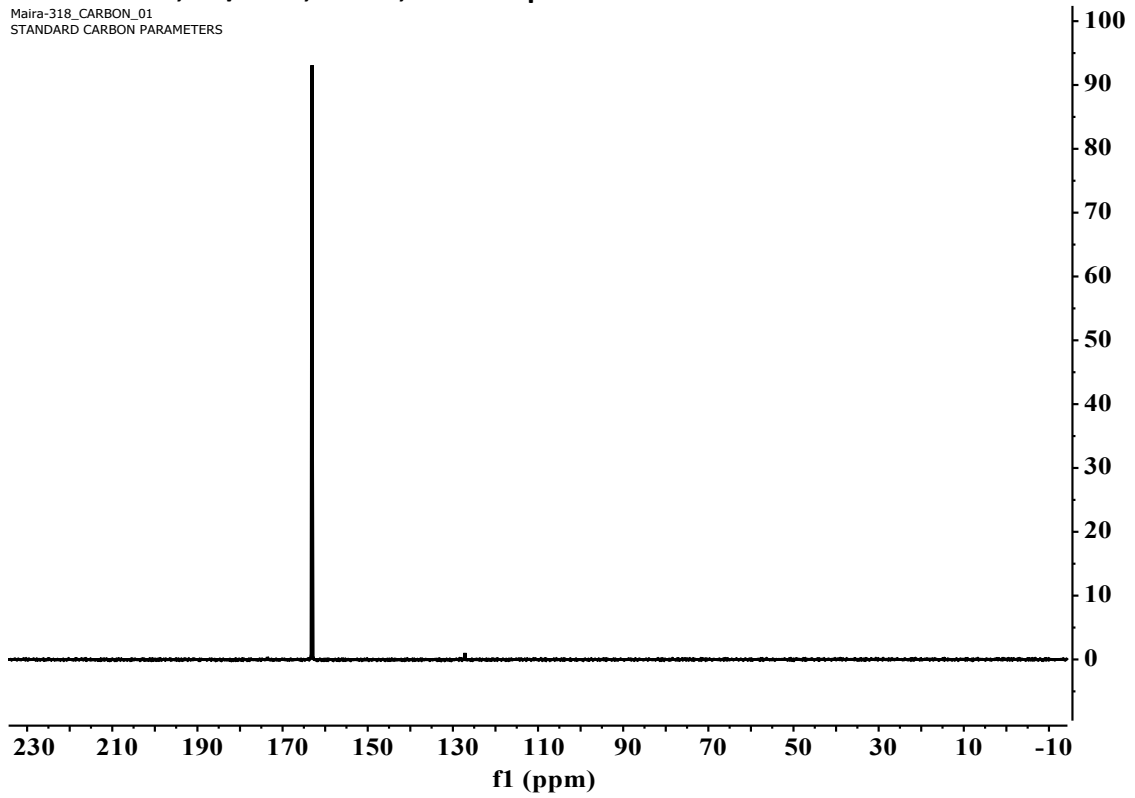

**Pine needles, Pd/C 5%, 200°C, proton spectra**

Maira-318\_PRESAT\_01  
STANDARD PROTON PARAMETERS

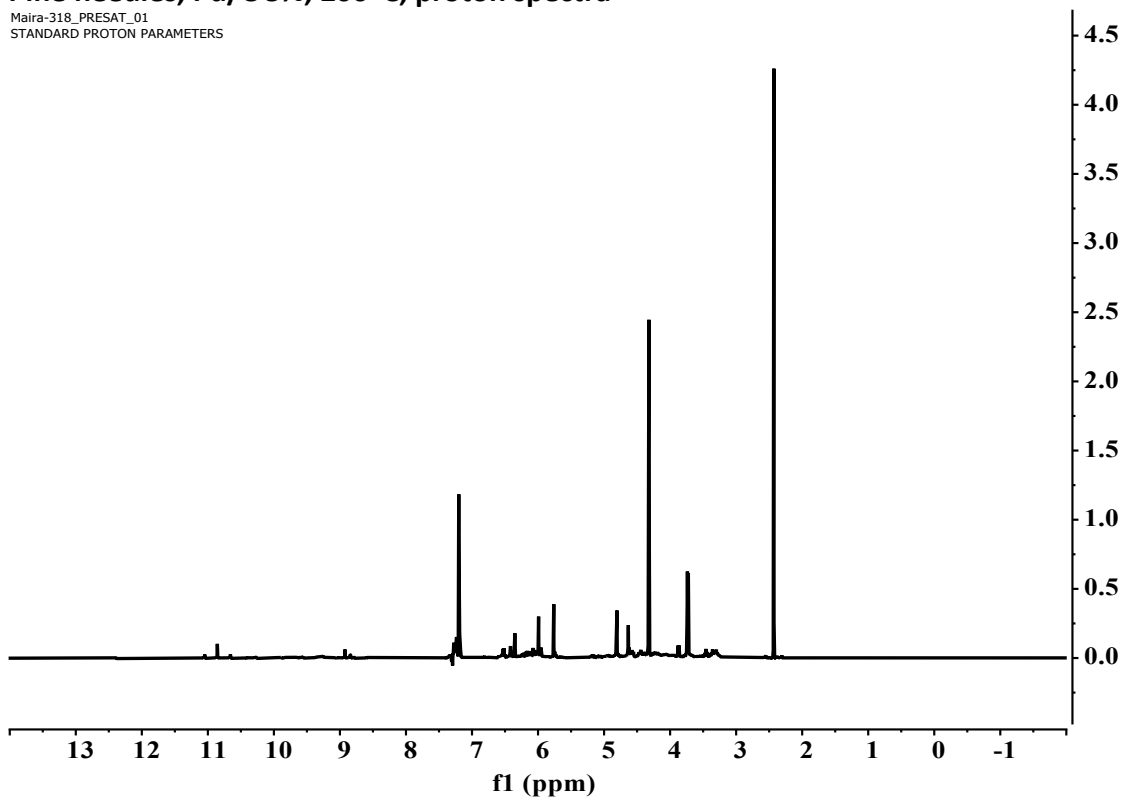



### Vermicompost, Pd/C 5%, 200°C, carbon spectra

Maira-319\_CARBON\_01  
STANDARD CARBON PARAMETERS

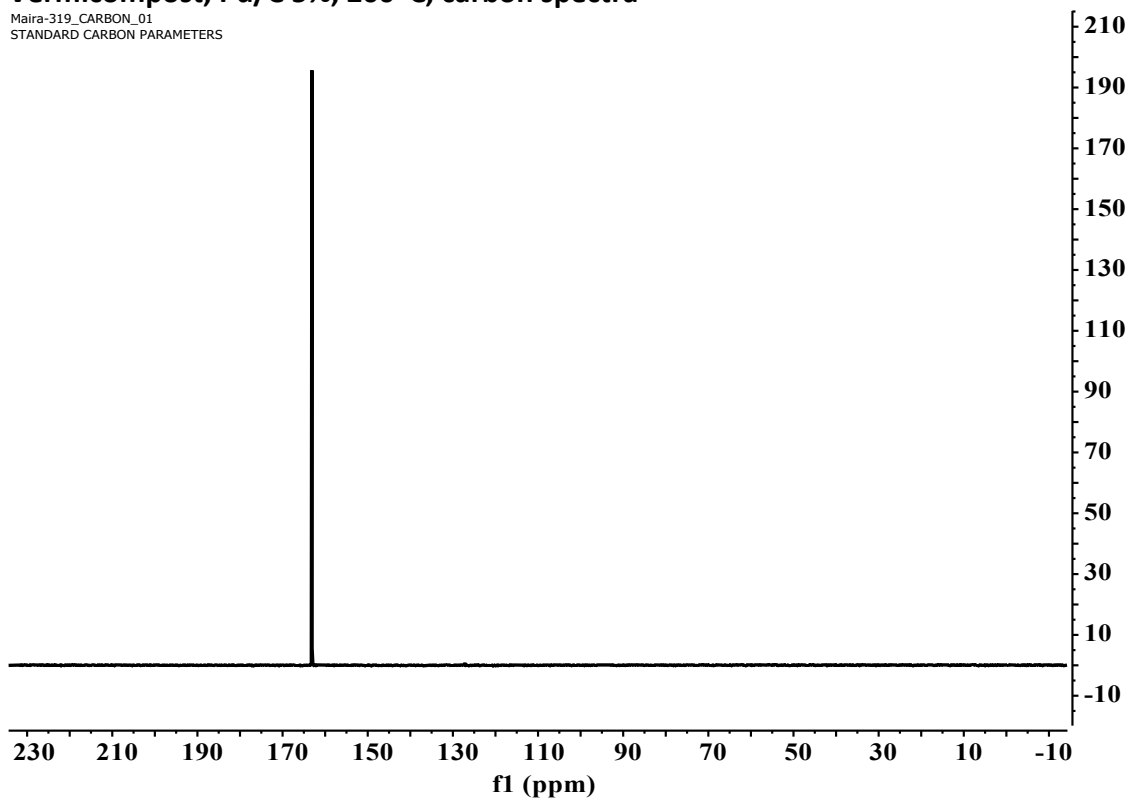

### Vermicompost, Pd/C 5%, 200°C, proton spectra

Maira-319\_PRESAT\_01  
STANDARD PROTON PARAMETERS

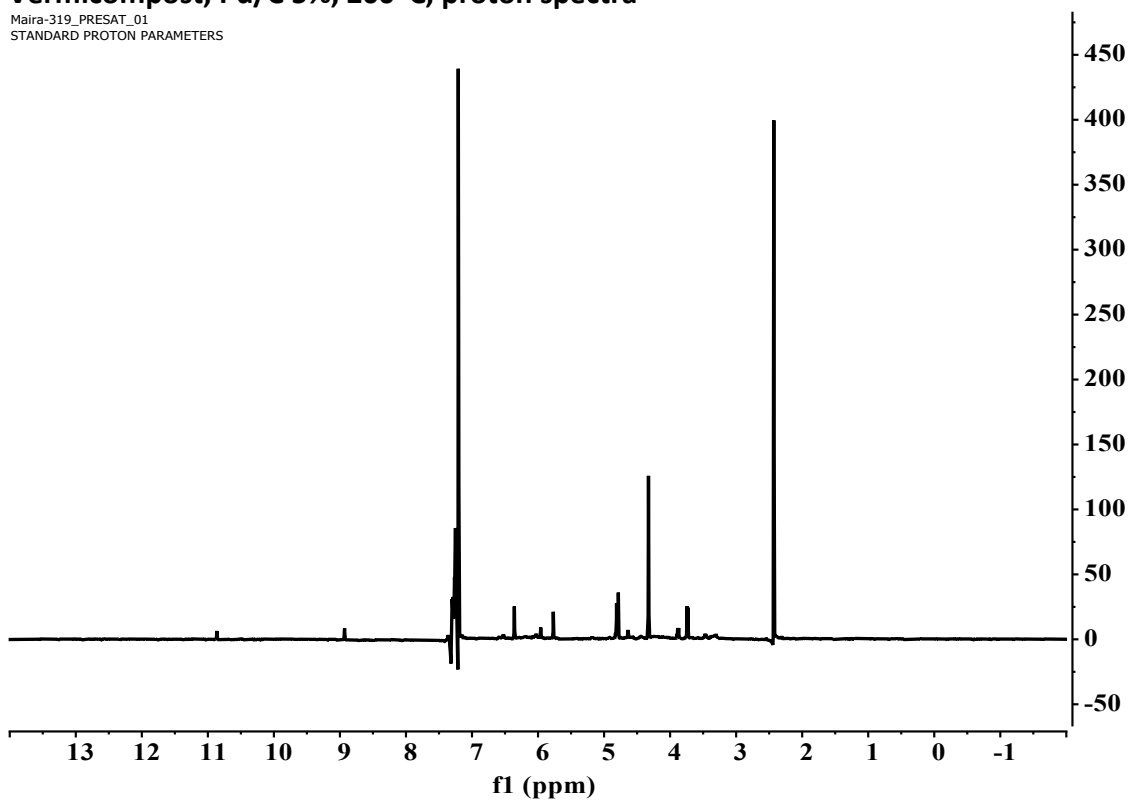

### Sugarcane bagasse, Pd/C 5%, 200°C, carbon spectra

Maira-320\_CARBON\_01  
STANDARD CARBON PARAMETERS

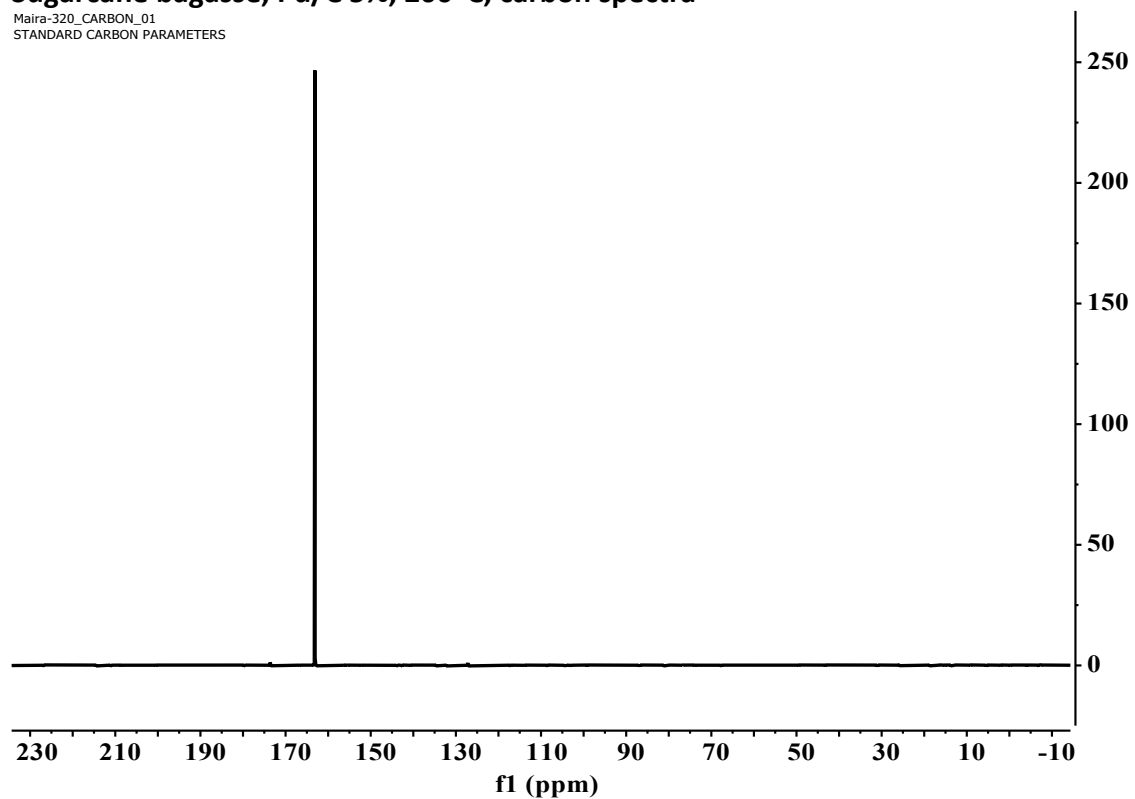

### Sugarcane bagasse, Pd/C 5%, 200°C, proton spectra

Maira-320\_PRESAT\_01  
STANDARD PROTON PARAMETERS

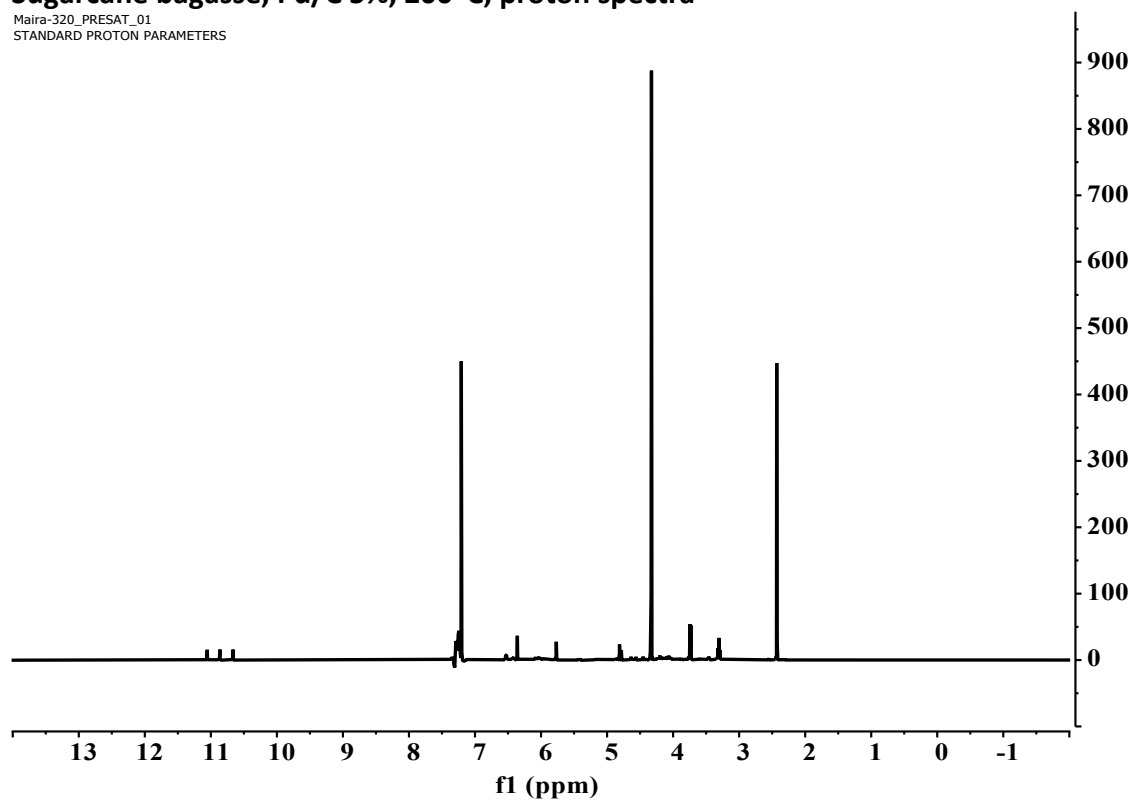

**Cellulose, Pd/C 5%, 200°C, carbon spectra**

Maira-321\_CARBON\_01  
STANDARD CARBON PARAMETERS

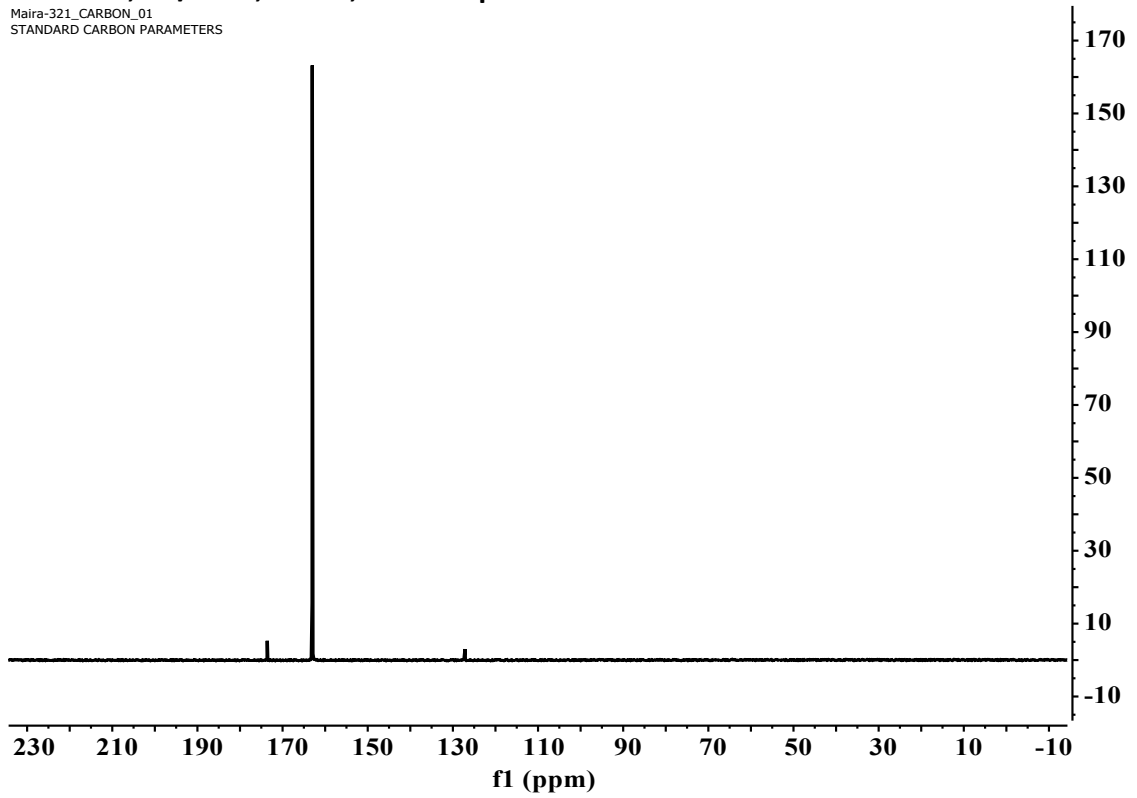

**Cellulose, Pd/C 5%, 200°C, proton spectra**

Maira-321\_PRESAT\_01  
STANDARD PROTON PARAMETERS

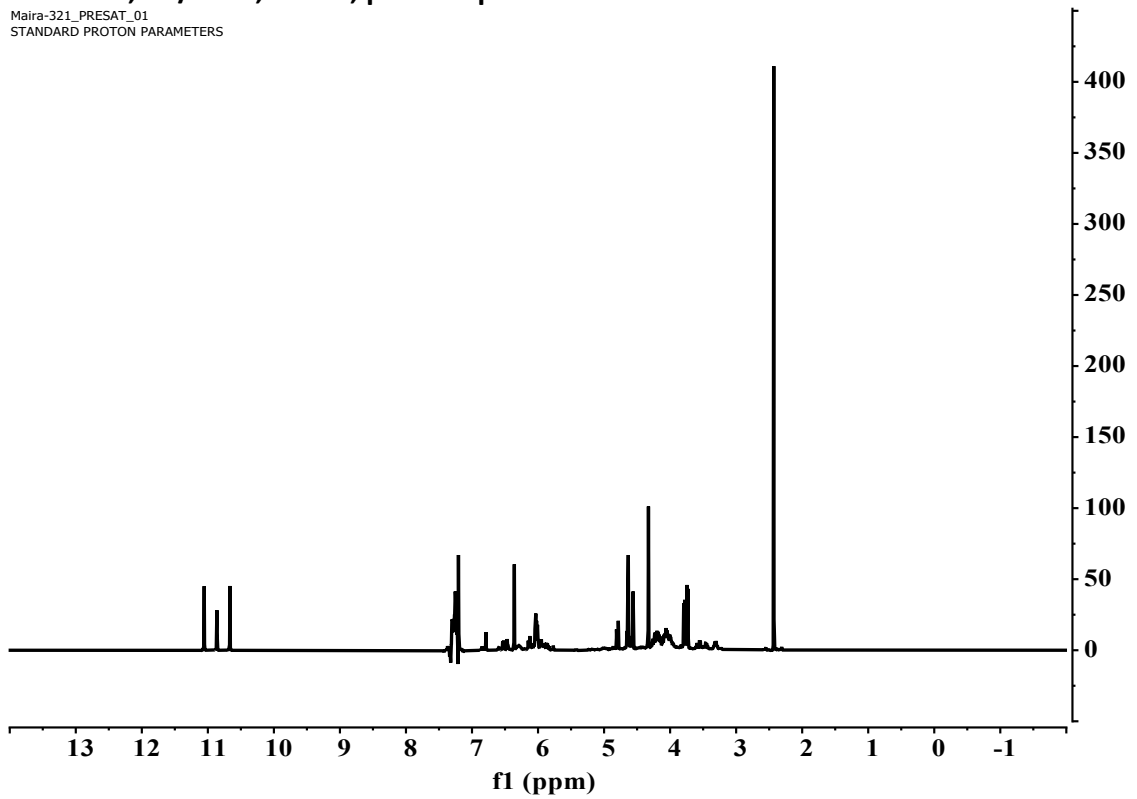

### Cork, Pd/C 5%, 200°C, carbon spectra

Maira-322\_CARBON\_01  
STANDARD CARBON PARAMETERS

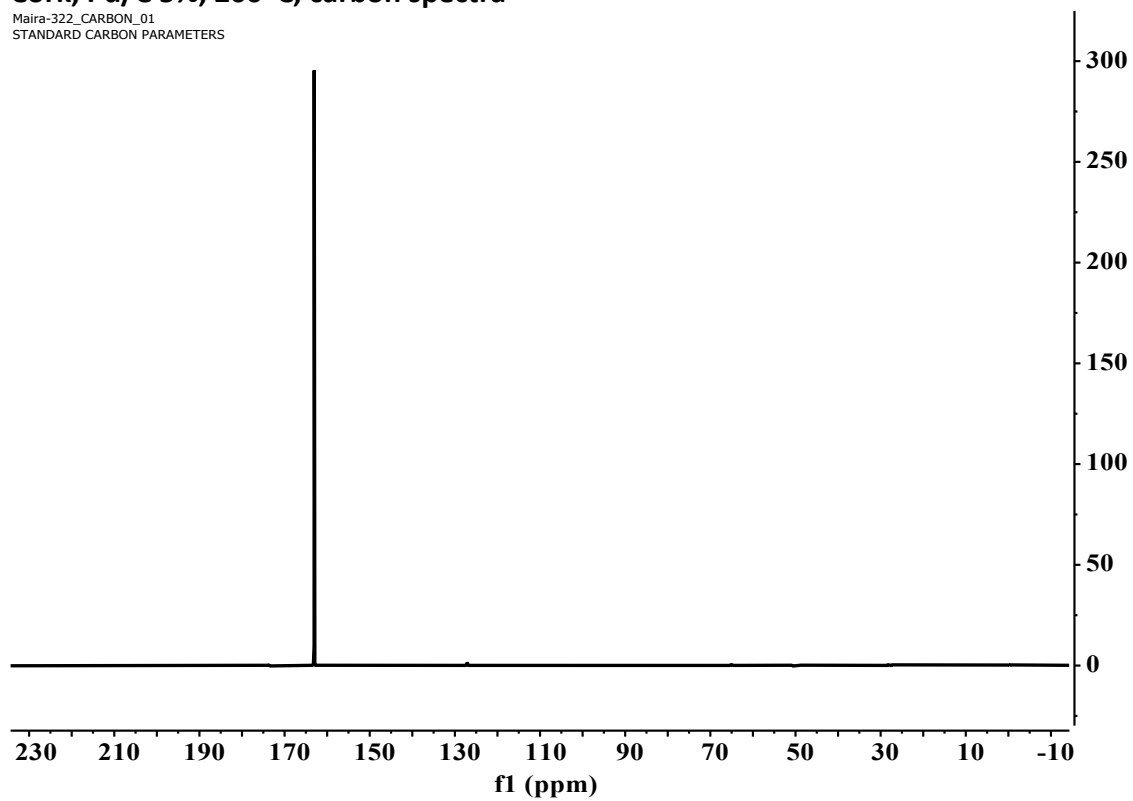

### Cork, Pd/C 5%, 200°C, proton spectra

Maira-322\_PRESAT\_01  
STANDARD PROTON PARAMETERS

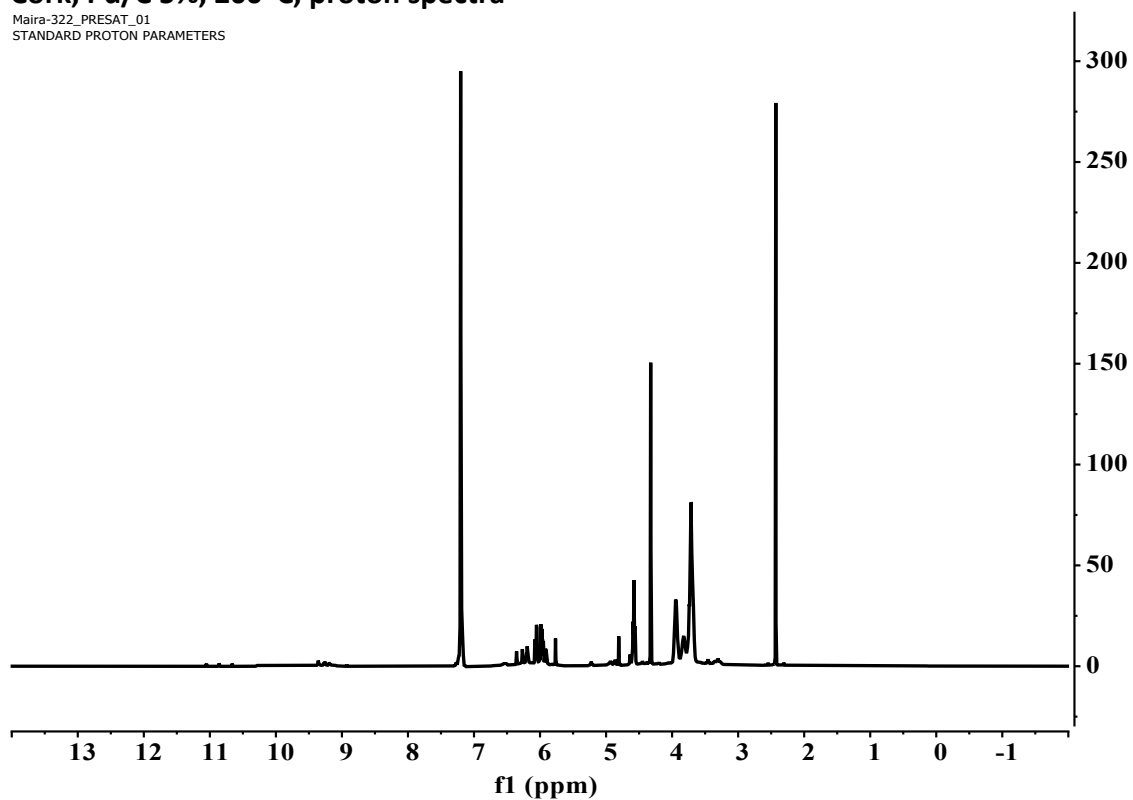

### Softwood, Pd/C 5%, 200°C, carbon spectra

Maira-323\_CARBON\_01  
STANDARD CARBON PARAMETERS

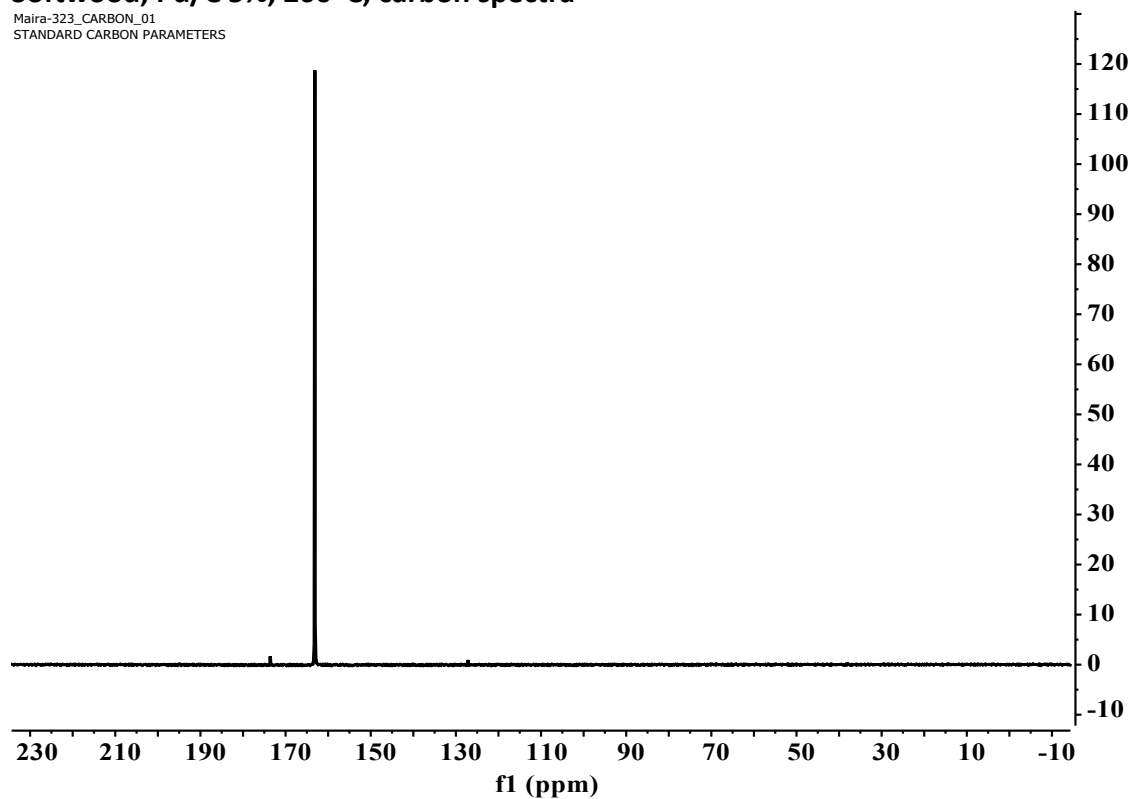

### Softwood, Pd/C 5%, 200°C, proton spectra

Maira-323\_PRESAT\_01  
STANDARD PROTON PARAMETERS

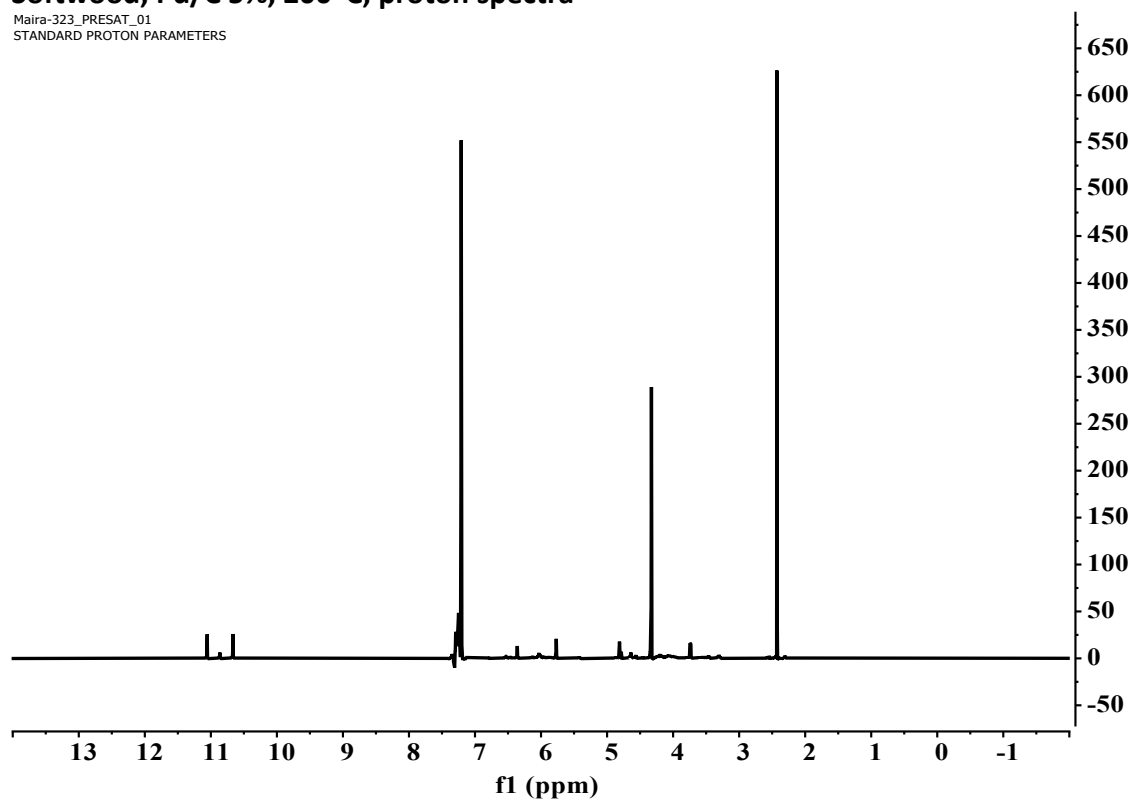

### Sugarbeet, Pd/C 5%, 200°C, carbon spectra

Maira-324\_CARBON\_01  
STANDARD CARBON PARAMETERS

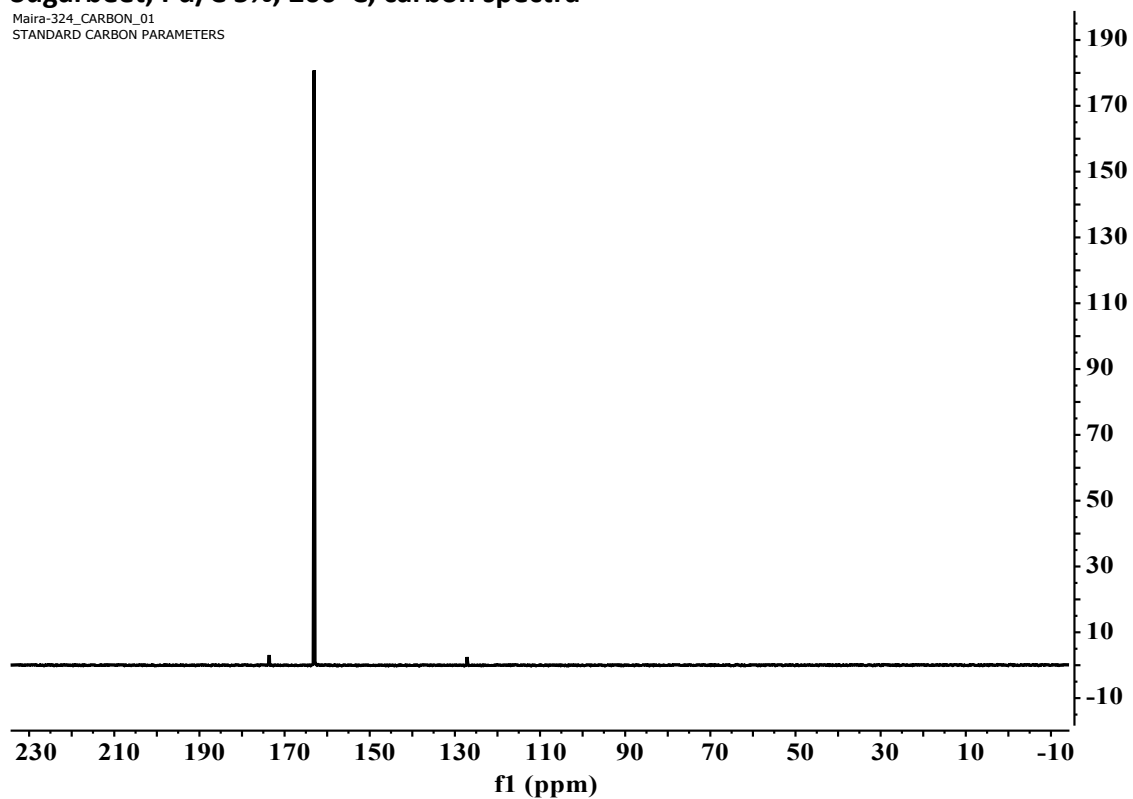

### Sugarbeet, Pd/C 5%, 200°C, proton spectra

Maira-324\_PRESAT\_01  
STANDARD PROTON PARAMETERS

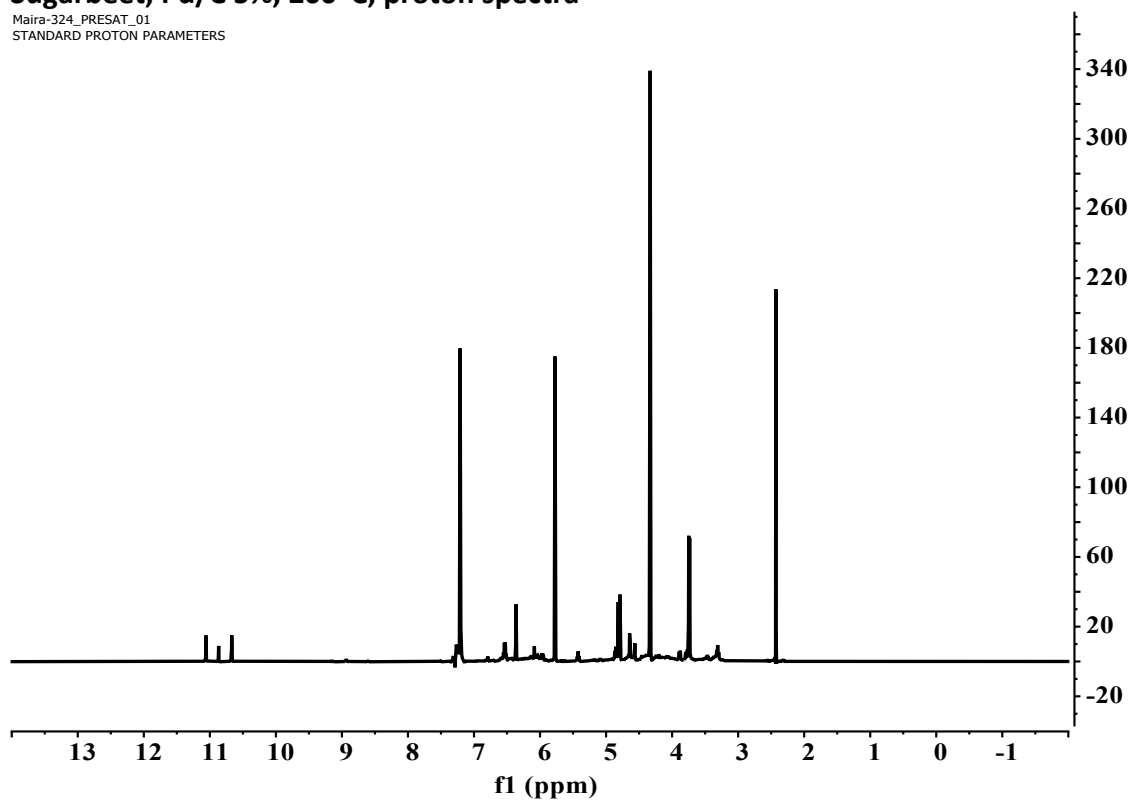

### Pine needles, Pd/C 5%, 200°C, carbon spectra

Maira-325\_CARBON\_01  
STANDARD CARBON PARAMETERS

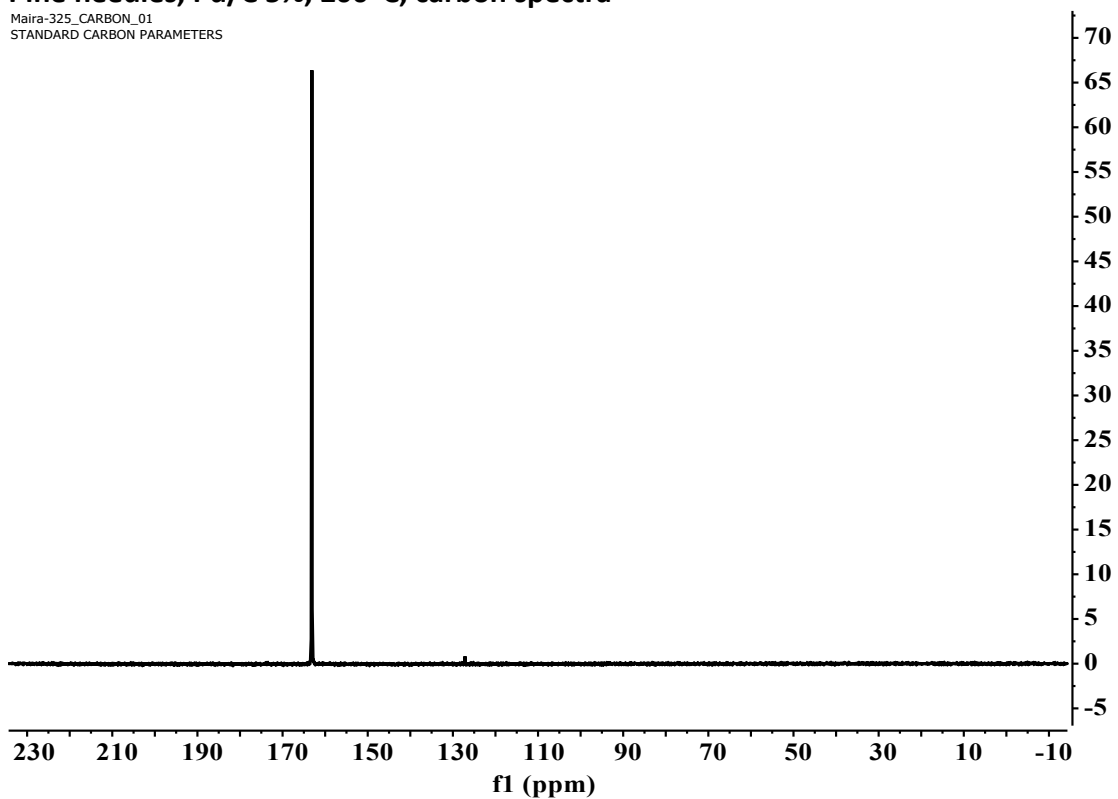

### Pine needles, Pd/C 5%, 200°C, proton spectra

Maira-325\_PRESAT\_01  
STANDARD PROTON PARAMETERS

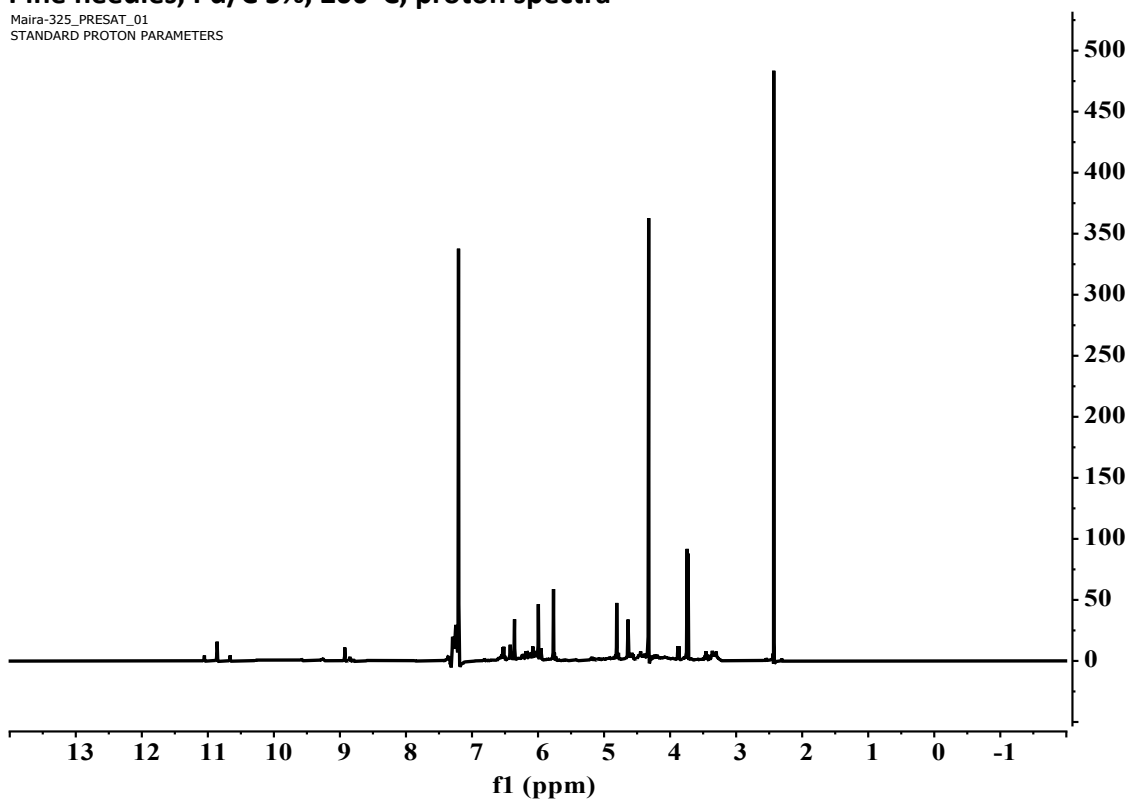

### Vermicompost, Pd/C 5%, 200°C, carbon spectra

Maira-326\_CARBON\_01  
STANDARD CARBON PARAMETERS

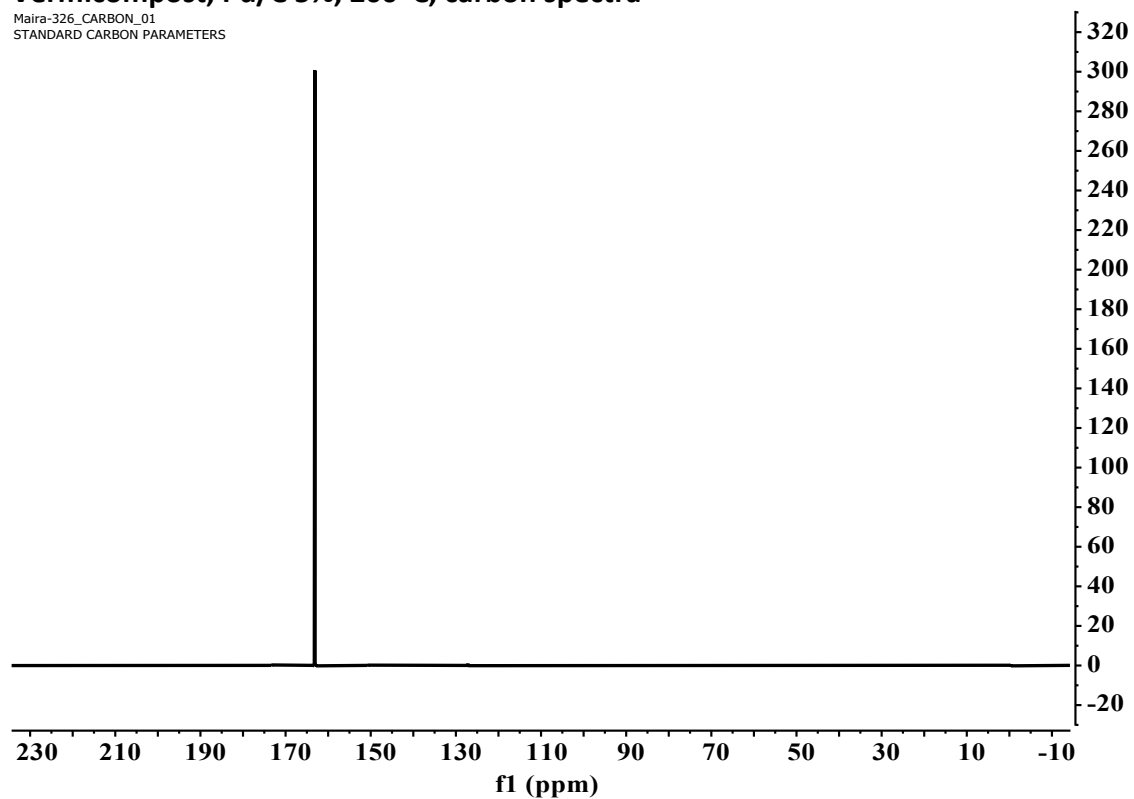

### Vermicompost, Pd/C 5%, 200°C, proton spectra

Maira-326\_PRESAT\_01  
STANDARD PROTON PARAMETERS

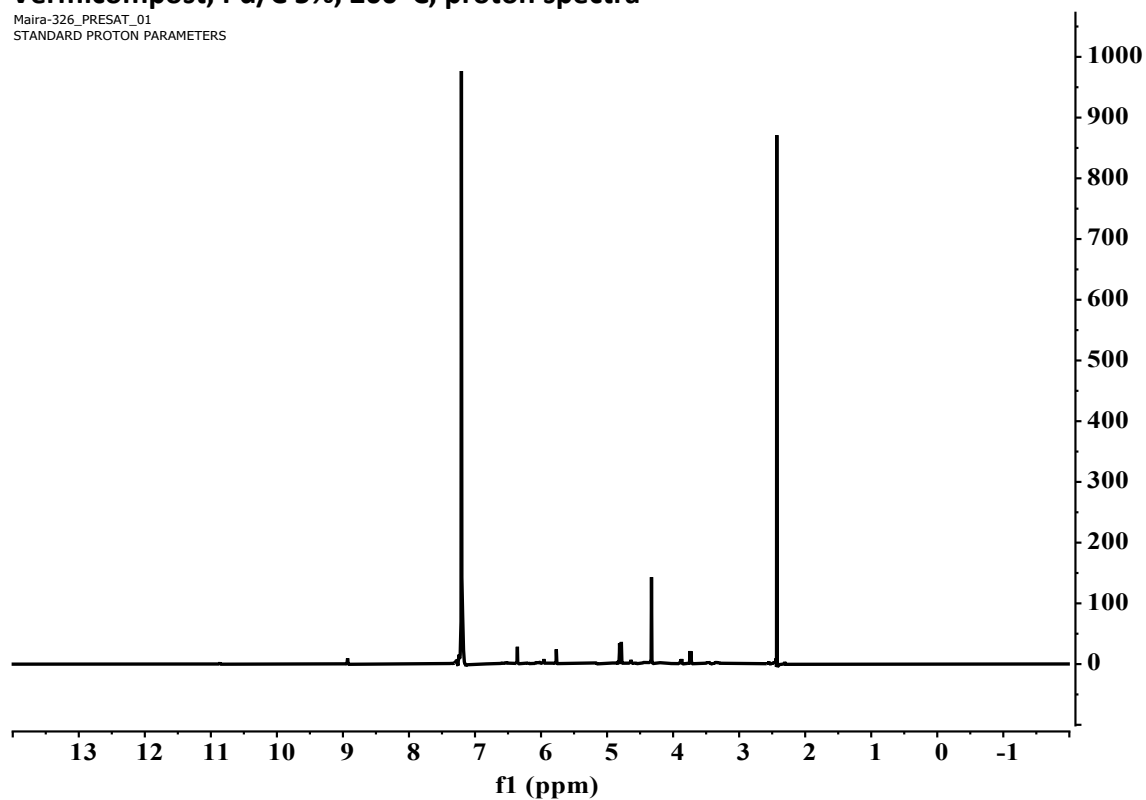



## 2<sup>nd</sup> EXPERIMENTS AT 200°C

### Sugarcane bagasse, Pd/C 5%, 200°C, carbon spectra

Maira-327\_CARBON\_01  
STANDARD CARBON PARAMETERS

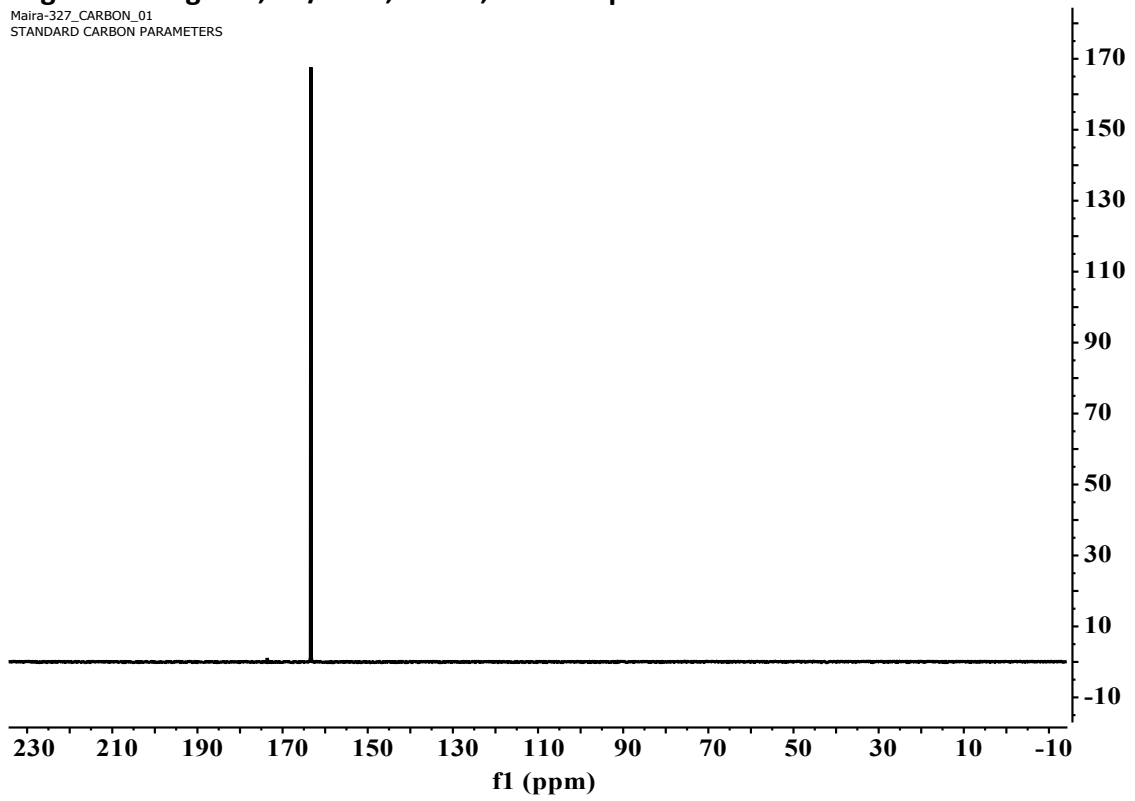

### Sugarcane bagasse, Pd/C 5%, 200°C, proton spectra

Maira-327\_PRESAT\_01  
STANDARD PROTON PARAMETERS

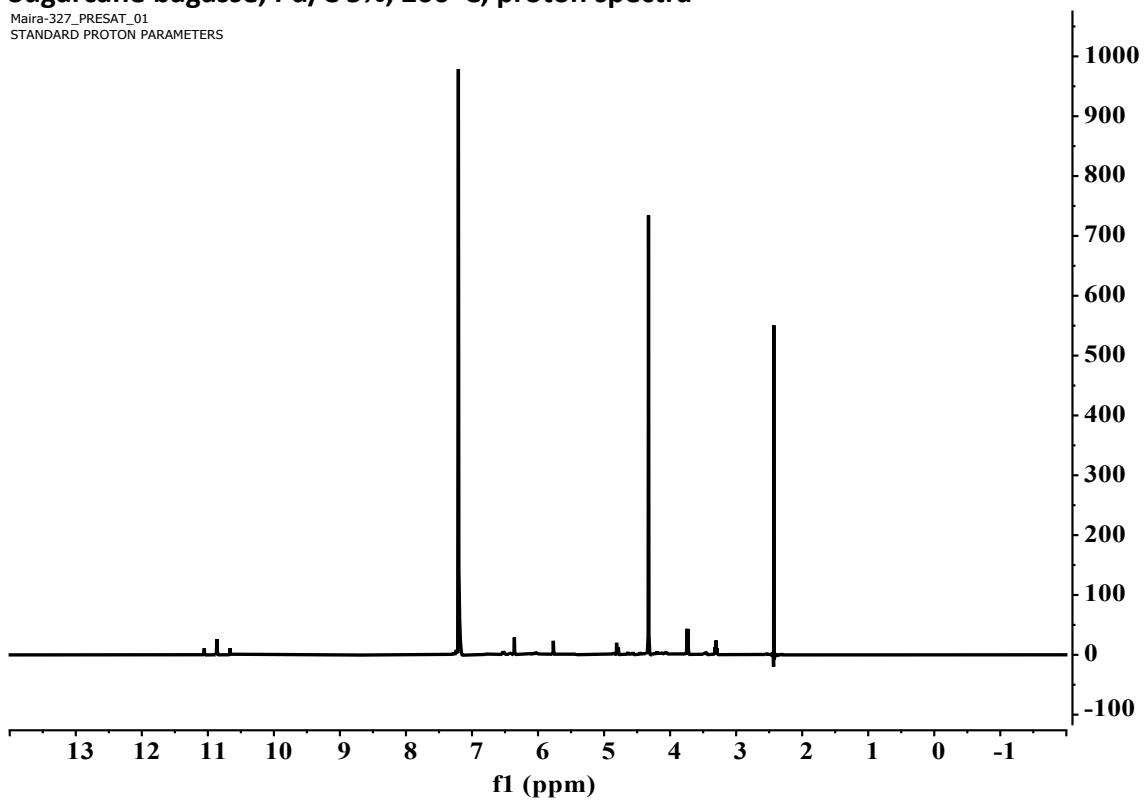

### Cellulose, Pd/C 5%, 200°C, carbon spectra

Maira-328\_CARBON\_01  
STANDARD CARBON PARAMETERS

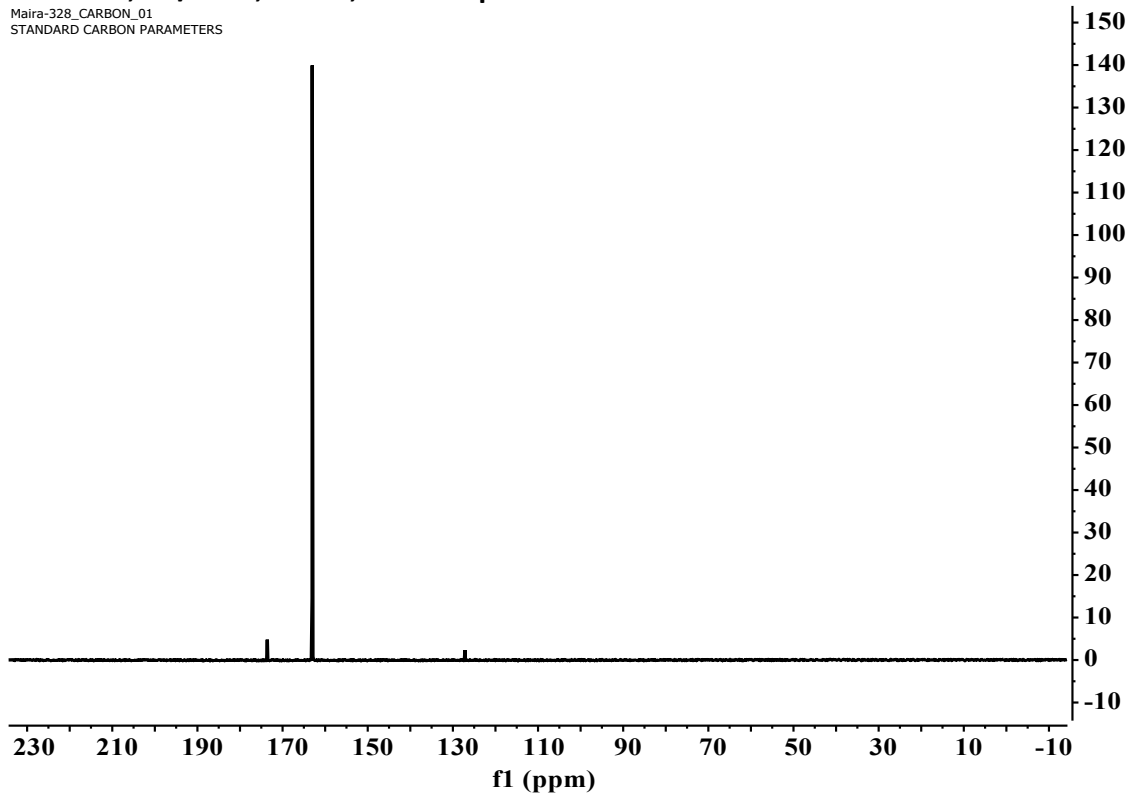

### Cellulose, Pd/C 5%, 200°C, proton spectra

Maira-328\_PRESAT\_01  
STANDARD PROTON PARAMETERS

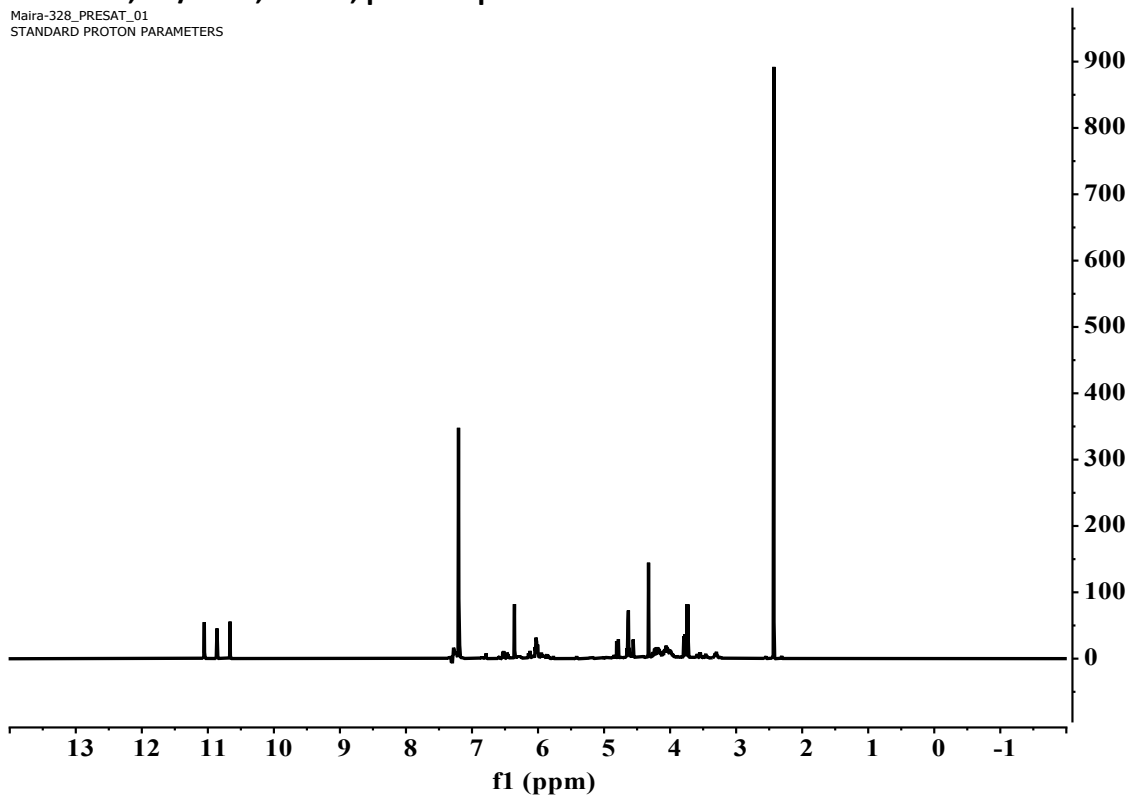

**Cork, Pd/C 5%, 200°C, carbon spectra**

Maira-329\_CARBON\_01  
STANDARD CARBON PARAMETERS

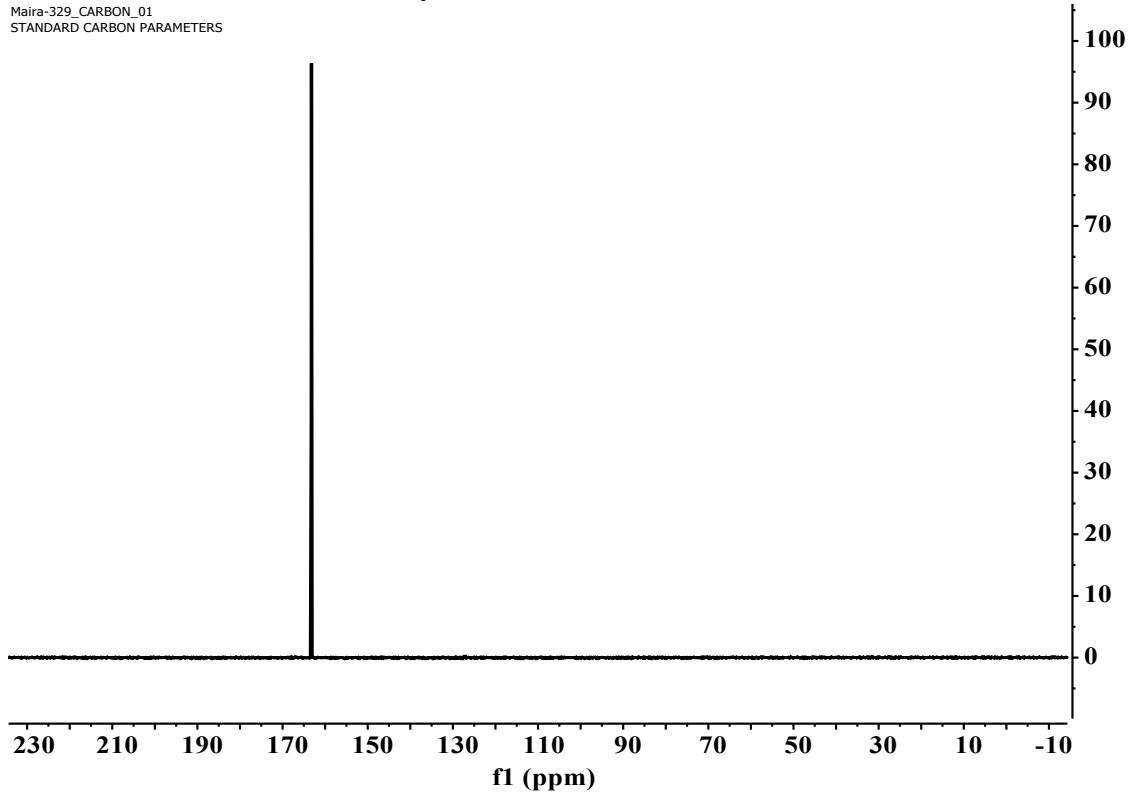

**Cork, Pd/C 5%, 200°C, proton spectra**

Maira-329\_PRESAT\_01  
STANDARD PROTON PARAMETERS

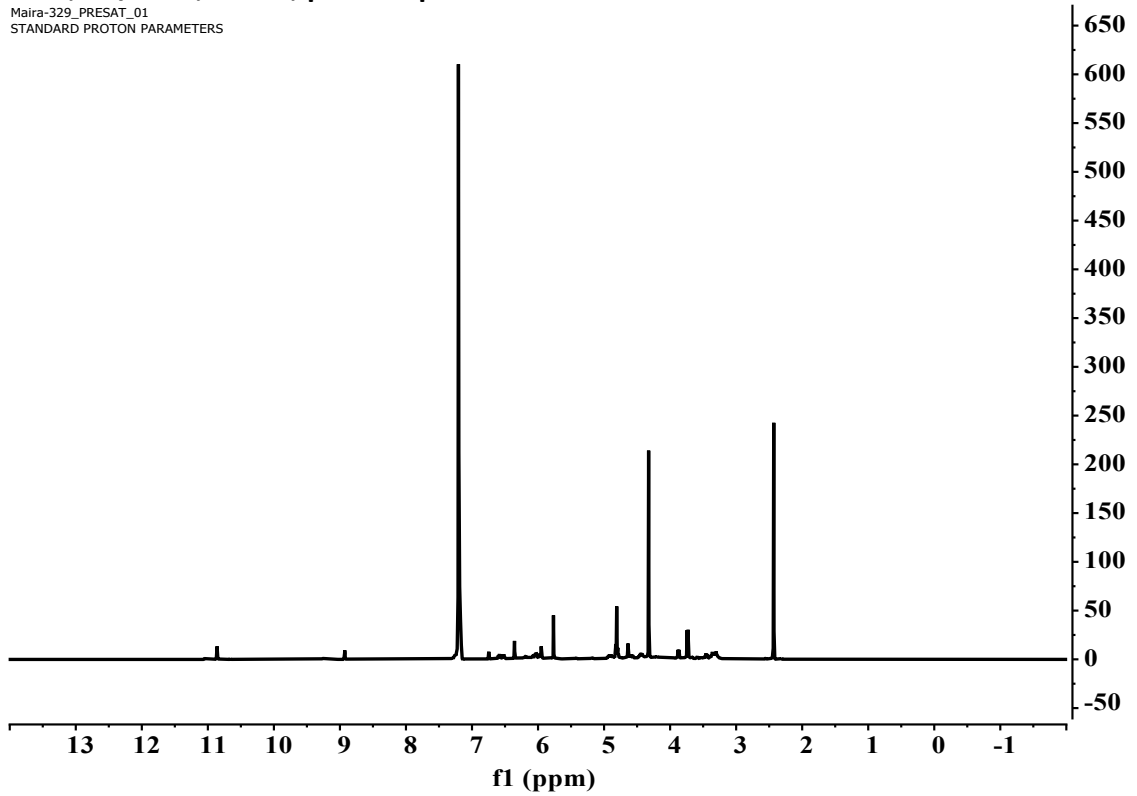

### Softwood, Pd/C 5%, 200°C, carbon spectra

Maira-330\_CARBON\_01  
STANDARD CARBON PARAMETERS

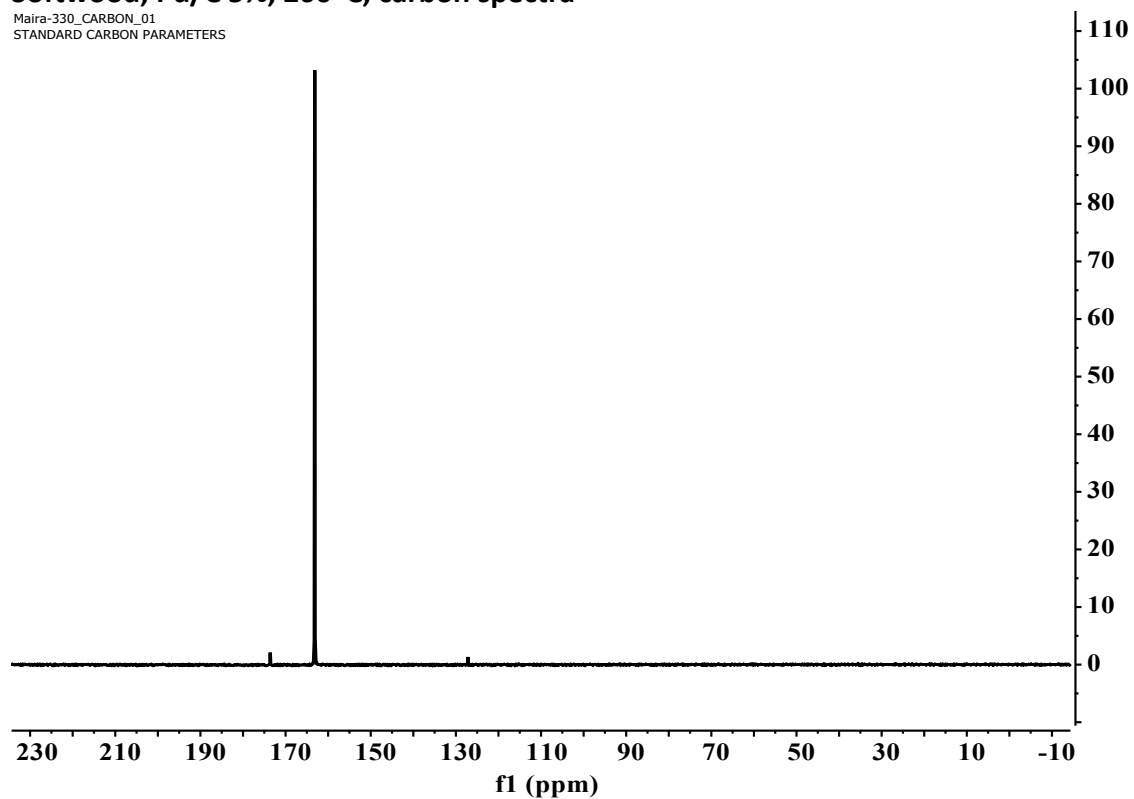

### Softwood, Pd/C 5%, 200°C, proton spectra

Maira-330\_PRESAT\_01  
STANDARD PROTON PARAMETERS

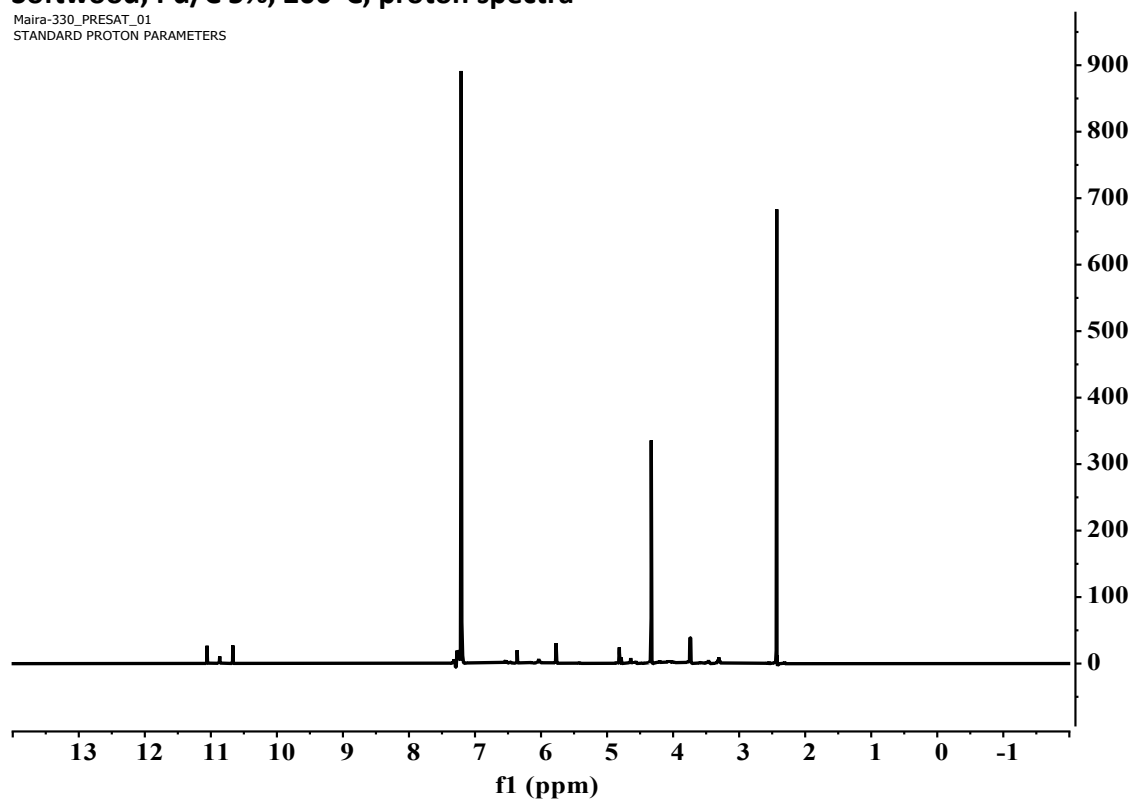

Supplement: d4su00440j1.pdf [file d4su00440j1.pdf]
